# Supplementary material for: Measuring the preference towards patient-centred communication with the Chinese-revised Patient–Practitioner Orientation Scale: a cross-sectional study among physicians and patients in clinical settings in Shanghai, China
Source: PubMed Central journal article supplement — BMJ Open. 2017 Sep 18;7(9):e016902. doi: 10.1136/bmjopen-2017-016902 (PMC5623567; doi:10.1136/bmjopen-2017-016902), 2017-09-18
Supplement: bmjopen-2017-016902.draft_revisions.pdf [file bmjopen-2017-016902.draft_revisions.pdf]

# BMJ Open

BMJ Open is committed to open peer review. As part of this commitment we make the peer review history of every article we publish publicly available.

When an article is published we post the peer reviewers' comments and the authors' responses online. We also post the versions of the paper that were used during peer review. These are the versions that the peer review comments apply to.

The versions of the paper that follow are the versions that were submitted during the peer review process. They are not the versions of record or the final published versions. They should not be cited or distributed as the published version of this manuscript.

BMJ Open is an open access journal and the full, final, typeset and author-corrected version of record of the manuscript is available on our site with no access controls, subscription charges or pay-per-view fees (<http://bmjopen.bmj.com>).

If you have any questions on BMJ Open's open peer review process please email [info.bmjopen@bmj.com](mailto:info.bmjopen@bmj.com)

# BMJ Open

## Measuring the preference toward patient-centered communication among physicians and patients in clinical settings with the Chinese-revised Patient-Practitioner Orientation Scale

|                                 |                                                                                                                                                                                                                                                                                                                                                                                                                                                                  |
|---------------------------------|------------------------------------------------------------------------------------------------------------------------------------------------------------------------------------------------------------------------------------------------------------------------------------------------------------------------------------------------------------------------------------------------------------------------------------------------------------------|
| Journal:                        | <i>BMJ Open</i>                                                                                                                                                                                                                                                                                                                                                                                                                                                  |
| Manuscript ID                   | bmjopen-2017-016902                                                                                                                                                                                                                                                                                                                                                                                                                                              |
| Article Type:                   | Research                                                                                                                                                                                                                                                                                                                                                                                                                                                         |
| Date Submitted by the Author:   | 17-Mar-2017                                                                                                                                                                                                                                                                                                                                                                                                                                                      |
| Complete List of Authors:       | Wang, Jie; School of Public Health, Fudan University, Department of Preventive Medicine<br>Zou, Runyu; Erasmus University Medical Center, Department of Epidemiology, Department of Child and Adolescent Psychiatry<br>Fu, Hua; School of Public Health, Fudan University<br>Qian, Haihong; School of Basic Medicine Science, Fudan University<br>Yan, Yueren; School of Public Health, Fudan University<br>Wang, Fan; School of Public Health, Fudan University |
| <b>Primary Subject Heading</b>: | Communication                                                                                                                                                                                                                                                                                                                                                                                                                                                    |
| Secondary Subject Heading:      | Patient-centred medicine                                                                                                                                                                                                                                                                                                                                                                                                                                         |
| Keywords:                       | Patient-centered communication, Clinical setting, Chinese, Scale                                                                                                                                                                                                                                                                                                                                                                                                 |
|                                 |                                                                                                                                                                                                                                                                                                                                                                                                                                                                  |

SCHOLARONE™  
Manuscripts

Only

1  
2  
3  
4 **Measuring the preference toward patient-centered communication**  
5  
6 **among physicians and patients in clinical settings with the**  
7  
8 **Chinese-revised Patient–Practitioner Orientation Scale**  
9

10  
11 Jie Wang<sup>a</sup>, <sup>1</sup> Runyu Zou<sup>b</sup>, Hua Fu<sup>a</sup>, Haihong Qian<sup>c</sup>, Yueren Yan<sup>a</sup>, Fan Wang<sup>a\*</sup>  
12

13  
14  
15 <sup>a</sup> *Key Laboratory of Public Health Safety, Ministry of Education, School of Public*  
16 *Health, Fudan University<sup>1</sup>, Shanghai, China.*  
17

18  
19 <sup>b</sup> *Department of Epidemiology, Department of Child and Adolescent Psychiatry,*  
20 *Erasmus University Medical Center, Rotterdam, the Netherlands.*  
21

22  
23 <sup>c</sup> *School of Basic Medicine Science, Fudan University, Shanghai, China.*  
24

25  
26 **Words count: 3967**  
27  
28  
29  
30  
31  
32  
33  
34  
35  
36  
37  
38  
39  
40  
41  
42  
43  
44  
45  
46  
47  
48  
49  
50  
51  
52  
53  
54

---

55 <sup>1</sup> Runyu Zou as joint first author

56 \* Corresponding author at: P.O. Box 248, 138 Yixueyuan Road, 200032, Shanghai, China.

57 E-mail address: [wangfan512@126.com](mailto:wangfan512@126.com) Tel:86-21-54237509 (F. Wang)

## Abstract

*Objectives:* The study aimed to explore the preference toward patient-centered communication among physicians and patients with the Chinese-revised Patient-Practitioner Orientation Scale (CR-PPOS).

*Setting:* Participants were recruited in clinical settings from eight medical institutes, including four community hospitals and four general hospitals, in Shanghai, China.

*Design and participants:* Questionnaire-based surveys were conducted among a total of 1018 physicians and patients, in two successive stages in the year of 2015.

*Outcome measurements:* Analysis mainly probed (1) psychological properties of the original Chinese-translated PPOS version versus the CR-PPOS (2) participants' scores on the CR-PPOS and the influential factors.

*Results:* Compared with the original PPOS, the 11-item CR-PPOS obtained better reliability and validity indicators. Furthermore, it also showed good discriminative power. Physicians and patients scored significantly differently on each subscale, as well as the total scale of CR-PPOS. Scores of patients were more likely to be influenced by various factors, such as age and education, compared with those of physicians.

*Conclusions:* The CR-PPOS is a better instrument in the Chinese context than the original translated version. The congruence and divergence in the extent to which patient-centered communication was preferred among Chinese physicians and patients should be noted. Adapting physicians' communication strategy to patients' preference based on their personal features can be an approach to improve clinical efficiency.

**Keywords:** Patient-centered communication, Clinical setting, Chinese, Scale

1  
2  
3  
4  
5  
6  
7  
8  
9  
10  
11  
12  
13  
14  
15  
16  
17  
18  
19  
20  
21  
22  
23  
24  
25  
26  
27  
28  
29  
30  
31  
32  
33  
34  
35  
36  
37  
38  
39  
40  
41  
42  
43  
44

*Article summary: Strengths and limitations of this study*

- Psychometric properties of PPOS were systematically assessed in Chinese context, with common indicators of reliability, validity and discriminative power.
- Preference toward patient-centered communication among Chinese physicians was simultaneously measured with that of patients using adapted PPOS, which made it possible to make comparisons and find differences between both sides.
- The association between broader variables and participants' preference toward patient-centered communication was explored, such as burnout for physicians and health literacy for patients.
- Due to feasibility, the participants in this study were only drawn from eight clinical units in Shanghai, and sampling was not exact random, which both brought the issue on selection bias and limited generalization validity.
- It might be problematic to directly compare scores measured by CR-PPOS and scores measured by other versions of PPOS because we developed the CR-PPOS from the original PPOS mainly based on statistical approach, without any supplementary items being added to keep the amount of items constant.

45  
46  
47  
48  
49  
50  
51  
52  
53  
54  
55  
56  
57  
58  
59  
60

**Introduction**

Since its first introduction by Balint in 1969<sup>[1]</sup>, patient-centeredness has been one of the most frequently discussed principles in medical practices over the past few decades<sup>[2]</sup>. It has also been regarded as one of the six core components of high-quality medical care<sup>[3]</sup>. Enhancing patient-centeredness is eagerly highlighted to improve the quality of health care delivery<sup>[4]</sup>.

Without a uniform definition<sup>[5]</sup>, various conceptual models were raised to illustrate

1  
2  
3 patient-centeredness<sup>[6,7]</sup>. Epstein<sup>[8]</sup> further determined that patient-centeredness could  
4 be fulfilled from three levels: interpersonal behaviors, technical intervention, and  
5 health system innovation. As a key element in interpersonal behaviors between  
6 physicians and patients, patient-centered communication has been a highly  
7 recommended model, enabling practitioners to offer care that is concordant with the  
8 patient's values, needs, and preferences, and that allows patients to become actively  
9 involved in decision making regarding their health<sup>[9,10]</sup>. Patient-centered  
10 communication contributes to building a partnership between physicians and patients,  
11 instead of the traditional paternalism<sup>[11]</sup>. Patient-centered communication has also  
12 been reported to improve a variety of patients' clinical outcomes in diverse settings,  
13 and enhance their adherence to prescription medications and other types of  
14 treatment<sup>[12,13]</sup>.

15  
16  
17  
18  
19  
20  
21  
22  
23  
24  
25  
26  
27 However, considering the cultural and contextual differences, patient-centered  
28 communication may not be universally applicable despite the benefits it  
29 offers<sup>[14]</sup>. Thus it is suggested that physicians learn patients' communication  
30 preference and then incorporate identified communication strategies into their  
31 communication style<sup>[15]</sup>. However, available instruments that aim to measure the  
32 preference toward patient-centered communication remain sparse. Originally  
33 developed by Edward Krupat<sup>[16]</sup>, the Patient-Practitioner Orientation Scale (PPOS),  
34 embracing the four elements model of patient-centeredness, has been translated into  
35 various languages and has gained worldwide popularity in measuring the preference  
36 toward patient-centered communication among physicians, medical students, and  
37 patients<sup>[17-20]</sup>.

38  
39  
40  
41  
42  
43  
44  
45  
46  
47  
48  
49 In China, accounts of patient-physician communication have been hotspots in the new  
50 healthcare era, as patient-centeredness is increasingly highlighted in clinical practice.  
51 Ting<sup>[21]</sup> conducted a survey to detect patients' preferences toward patient-centered  
52 communication in a hospital in the southwest part of China, which was the only  
53 known attempt to apply PPOS in China. Despite the innovativeness, there were  
54 several limitations within this study. For example, as an instrument introduced from  
55  
56  
57  
58  
59  
60

1  
2  
3  
4  
5  
6  
7  
8  
9  
10  
11  
12  
13  
14  
15  
16  
17  
18  
19  
20  
21  
22  
23  
24  
25  
26  
27  
28  
29  
30  
31  
32  
33  
34  
35  
36  
37  
38  
39  
40  
41  
42  
43  
44  
45  
46  
47  
48  
49  
50  
51  
52  
53  
54  
55  
56  
57  
58  
59  
60

abroad, the psychometric properties, such as reliability and validity, of PPOS in the Chinese context have not been well tested. Secondly, the preference toward conducting patient-centered communication among physicians has not yet been explored. Finally, for a country with vast territory and a population in the billions, a single survey conducted in a specific medical unit may not be adequately representative. Thus it is not clear yet how this instrument works in other regions and surroundings.

We conducted this research in Shanghai, which was among the most developed cities in China and possessed abundant high-quality medical resources, aiming to adapt PPOS to Chinese (Mandarin) context and assess its psychometric properties systematically. Furthermore, patients' as well as physicians' preferences toward patient-centered communication were measured using the Chinese-revised PPOS (CR-PPOS). In addition, factors that might exert influence on physicians' and patients' preferences toward patient-centered communication were further explored.

## ***Methods***

### ***Description of the instrument***

Currently, PPOS has evolved to a version containing 18 items in two dimensions, Caring and Sharing<sup>[22]</sup>. The nine-item Caring subscale reflects the degree to which physicians care about providing warmth and emotional support and regard patient as a whole person. The nine-item Sharing subscale reflects the degree to which physicians should share decision making information and power with the patients<sup>[16]</sup>. A higher PPOS total score as well as subscale scores indicates a higher preference toward patient-centered style in clinical communication. Conversely, a low Caring score indicates a tendency toward disease-centered style, while a low Sharing score indicates a tendency toward doctor-centered style.

### ***Translation and cultural adaption***

1  
2  
3  
4  
5  
6  
7  
8  
9  
10  
11  
12  
13  
14  
15  
16  
17  
18  
19  
20  
21  
22  
23  
24  
25  
26  
27  
28  
29  
30  
31  
32  
33  
34  
35  
36  
37  
38  
39  
40  
41  
42  
43  
44  
45  
46  
47  
48  
49  
50  
51  
52  
53  
54  
55  
56  
57  
58  
59  
60

Obtaining the permission to translate and develop PPOS in the Chinese context by the original author, scholars with academic backgrounds in medicine, public health, journalism, and communication, Chinese and English languages, respectively, were invited to translate the PPOS to Chinese(Mandarin).Afterward, the bilingual PPOS versions were sent separately to another five advanced health practitioners for further suggestions and modifications. The Chinese PPOS(C-PPOS) was then back-translated into English and sent back to the original author for confirmation.

For this C-PPOS, we strove to fit every item to its original version, except for item 17 due to noticeable culture difference. Thus, it was replaced by “A friendly manner is a major ingredient in the doctor’s treatment of the patients”, according to the results of a prior study in Nepal<sup>[23]</sup>. Additionally, item 2 was back-translated as “Compared with centering on individual patients in the past, focusing on the comprehensive quality of medical services nowadays is more valuable for propelling medical development”, which differed from the original item “Although health care is less personal these days, this is a small price to pay for medical advances” in expression but was mostly consistent in meaning. Finally, 12 physicians and 18 patients were enrolled in cognitive interviews to further enhance the comprehensibility of the scale in the Chinese cultural context.

### ***Pilot study design***

A pilot study was conducted in eight clinical settings in Shanghai, including four community hospitals and four general hospitals. As a minimum sample size of 5 to 10 times the number of scale items for exploratory factor analysis (EFA) and 10 to 20 times for confirmative factor analysis<sup>[24]</sup> was required, as well as taking the probable invalid responses into consideration, we included 400 interviewees. It was assumed that physicians should comprise at least 20% of the total sample. Physicians and patients were randomly recruited from the outpatient department of each hospital. Every eligible participant was requested to complete an anonymous short questionnaire containing the C-PPOS. Retrieved questionnaires were carefully



checked, and those with bad quality were removed from the dataset, including those with missing item scores or with the same item score throughout the entire scale.

### ***Psychometric properties assessment***

In this study, we assessed the psychometric properties via reliability, validity, and discriminative power tests, based on which the C-PPOS was revised to the CR-PPOS.

Internal consistency and test–retest reliability are the most widely tested indicators for reliability, thus we performed both in this study. In the test–retest survey, 60 participants completed the C-PPOS again after 2 to 4 weeks.

Hereby we performed EFA and confirmatory factor analysis (CFA) to assess construct validity. In addition, content validity was assessed by testing the correlation of the score of each item and the score of the subscale the item belonged to, as well as the score of the total scale.

Discriminative power reflects the extent to which an item can distinguish different levels of target variables. We tested discriminative power by comparing the critical value (CR) of each item.

### ***Formal study design***

The formal survey was launched 1 month later, in the same settings where the pilot study was conducted. As a cross-sectional study, the sample size was calculated to be 664 according to the formula provided by Raosoft, Inc.<sup>[25]</sup>, with a total population size of 24,000,000 (the estimated population of Shanghai) and a confidence level of 99%.

It was then expanded to 750 to guarantee adequate valid responses. Physician and patient participants were randomly recruited in a similar way as that in the pilot study.

After confirming the informed consent, participants were asked to complete a questionnaire containing CR-PPOS, general information (gender, age, education, marriage status, socioeconomic status, self-reported health condition, etc.), and some other well-validated instruments, such as the Patient Confidence in Communication

1  
2  
3 Scale (PCCS)<sup>[26]</sup>, Hospital Anxiety and Depression Scale (HADS), the Rapid Health  
4 Literacy Scale<sup>[27]</sup> for patients, and the Maslach Burnout Inventory-General Survey  
5 (MBI-GS) and Medical Communication Competence Scale (MCCS)<sup>[28]</sup> for  
6  
7 physicians.  
8  
9

### 10 11 *Statistical analysis*

12  
13 We utilized Epidata 3.1 and Excel 2007 software for dataset establishment. IBM SPSS  
14 20.0 and AMOS 21.0 were employed to perform data cleaning and analysis.  
15  
16

17  
18 Cronbach's  $\alpha$  coefficient was tested as the indicator of internal consistency and  
19 reliability. Normally, a Cronbach's  $\alpha$  of no less than 0.6 is deemed acceptable for an  
20 instrument with a relatively small number of items (i.e. no more than 6)<sup>[29]</sup>. Test-retest  
21 reliability was assessed as the indicator of interclass correlation coefficient (ICC).  
22 Test-retest reliability was considered poor if the ICC value was lower than 0.4 and/or  
23 the correlation was not statistically significant ( $P < 0.05$ ).  
24  
25  
26  
27  
28  
29

30  
31 For EFA, data were subjected to a principal component analysis with extraction of  
32 eigenvalues (greater than 1) for subscales (EFA round 1) and fixed two factors for the  
33 total scale (EFA round 2). In EFA round 1, items were removed if a) their factor  
34 loadings under either dimension were greater than 0.4, b) their factor loadings under  
35 any two dimensions were close (the absolute value difference was less than 0.1), and c)  
36 they were the only item under one dimension<sup>[30]</sup>.  
37  
38  
39  
40  
41  
42

43  
44 CFA was performed by maximum likelihood analysis to verify the main adjustment  
45 indices of the model, including chi-squared/degree of freedom ( $\chi^2/df$ ), root mean  
46 square error of approximation (RMSEA), goodness-of-fit index (GFI), adjusted  
47 goodness-of-fit index (AGFI), normed-fit index (NFI), incremental fit index (IFI), and  
48 comparative fit index (CFI). The recommended  $\chi^2/df$  ratio is 1 to 3, and RMSEA  
49 value  $< 0.08$  and GFI, AGFI, NNFI, IFI, and CFI  $> 0.9$  suggest ideal model fit<sup>[31]</sup>.  
50  
51  
52  
53  
54

55  
56 Respondents with the highest (top 27%) and lowest (bottom 27%) total scale scores  
57  
58  
59  
60

were divided into two groups, after which their CR values of each item were compared to determine their discriminative power<sup>[32]</sup>. The items without significantly distinct CRs were eliminated as they lacked competency to distinguish high scores and low scores.

For single factor analysis, we performed the t-test and analysis of variance (ANOVA) for parameter testing, and the Mann–Whitney U test for non-parameter testing. Multiple linear regression (MLR) was utilized in processing multifactor analysis. Statistical significance was set at  $P < 0.05$ .

### ***Ethnical consideration***

This study obtained approval from the Institutional Review Board (IRB) of the Fudan University School of Public Health. Informed consent was provided by all the participants before the survey.

### ***Results***

#### ***Pilot study***

#### ***Participants***

Three hundred and sixty-two eligible questionnaires were included in the pilot study from 395 participants, with a valid response rate of 91.65%. The mean age of the respondents was  $47.41 \pm 18.42$ , and approximately half of them had graduated from college (Table 1).

**Table 1**

Demographic characteristics of the pilot study sample (n=362)

| Demographic characteristics | Physicians (n=71) | Patient (n=291) |
|-----------------------------|-------------------|-----------------|
| <b>Mean age (range)</b>     | 39.39 (24–64)     | 49.43 (20–96)   |
| <b>Gender, n (%)</b>        |                   |                 |
| Male                        | 33                | 123 (42.3%)     |

|                          |            |             |
|--------------------------|------------|-------------|
|                          | 38         | 165 (56.6%) |
| <b>Education, n (%)</b>  |            |             |
| College and above        | 67 (94.4%) | 112 (38.5%) |
| Senior school            | 4 (5.6%)   | 83 (28.5%)  |
| Junior school            | 0          | 72 (24.7%)  |
| Primary school and below | 0          | 12 (4.1%)   |
| <b>Setting, n (%)</b>    |            |             |
| Community hospital       | 42 (59.2%) | 130 (44.7%) |
| General hospital         | 29 (40.8%) | 161 (55.3%) |

### ***Confirmatory factor analysis of the C-PPOS***

The CFA of the C-PPOS indicated poor model fit (Table 2), which called for further revision.

**Table 2**

Goodness-of-fit indices of the CFA of the CR-PPOS and the original C-PPOS

| Model fit indicator | Two factors<br>(18 items) | Two factors<br>(11 items) | Reference value |
|---------------------|---------------------------|---------------------------|-----------------|
| $\chi^2/df$         | 5.04                      | 1.85                      | <3              |
| P-value             | <0.001                    | <0.001                    | >0.05           |
| RMSEA               | 0.11                      | 0.06                      | <0.08           |
| GFI                 | 0.76                      | 0.94                      | >0.90           |
| AGFI                | 0.70                      | 0.90                      | >0.90           |
| NFI                 | 0.52                      | 0.81                      | >0.90           |
| IFI                 | 0.58                      | 0.90                      | >0.90           |
| CFI                 | 0.57                      | 0.90                      | >0.90           |

### ***Revision of the C-PPOS***

1  
2  
3 The Cronbach's  $\alpha$  of each subscale of C-PPOS was tested as the first step of item  
4 reduction. The Cronbach's  $\alpha$  of C-PPOS was 0.668, with a Caring subscale score of  
5 0.493 and a Sharing subscale of 0.575, showing poor internal consistent reliability.  
6  
7 Hence, items were eliminated in a stepwise manner for each subscale separately until  
8 elimination of another item would lead to a decrease in the Cronbach's  $\alpha$  of its  
9 corresponding dimension. Finally, five out of nine items were retained in the Caring  
10 subscale, and eight out of nine items (except for C-PPOS9) were retained in the  
11 Sharing subscale.  
12  
13

14  
15  
16  
17  
18  
19 In EFA, the Bartlett's sphericity test reported a Chi-square value of 112.364 ( $p < 0.001$ )  
20 for the Caring subscale and 146.846 ( $p < 0.001$ ) for the Sharing subscale. The Kaiser–  
21 Meyer–Olkin (KMO) indices for the two subscales were 0.727 and 0.694, respectively.  
22 For EFA round 1, all five of the retained items of the Caring subscale were under one  
23 principal component, which had an eigenvalue greater than 1 (2.197), explaining  
24 43.949% of the total variance. In the Sharing subscale, C-PPOS4 and C-PPOS10 were  
25 removed as they met exclusion criteria. Afterward, EFA was performed again on the  
26 retained six items of the Sharing subscale. This time all six items loaded under one  
27 principal component (eigenvalue=2.247), which explained 37.448% of the total  
28 variance. Subsequently, a fixed two-factor EFA was performed to verify the construct  
29 of the merged 11-item scale. The result indicated that the five items of the Caring  
30 subscale and the six items of the Sharing subscale were well separated, explaining  
31 41.67% of the total variance.  
32  
33  
34  
35  
36  
37  
38  
39  
40  
41  
42  
43  
44

45 CFA was performed with the 11-item revised C-PPOS (CR-PPOS), according to the  
46 prior model, indicating a more acceptable and greatly improved model fit compared  
47 with the original scale (Table 2).  
48  
49

### 50 ***Reliability of the CR-PPOS***

51  
52  
53  
54 The Cronbach's  $\alpha$  of the entire CR-PPOS was 0.735, with 0.709 in the Caring  
55 subscale and 0.644 in the Sharing subscale. Furthermore, the scores of the two  
56  
57  
58  
59  
60

subscale were significantly correlated to the total scale, with Spearman coefficients of 0.744 (Caring) and 0.840 (Sharing), which were higher than that of these two subscales (0.312). The ICC was 0.787 for the CR-PPOS, 0.911 for the Caring subscale, and 0.602 for the Sharing subscale. The ICC for the 11 single items ranged from 0.481 to 0.812. The correlations were all statistically significant ( $p < 0.001$ ), indicating satisfactory test-retest reliability.

### ***Validity of the CR-PPOS***

The construct validity was well verified through EFA and CFA (see above). As for content validity, the 11 items' scores and their corresponding subscales' scores were all significantly correlated ( $p < 0.01$ ), with Spearman coefficients ranging from 0.452 to 0.717.

### ***Discriminative power of the CR-PPOS***

The CR values of the 11 items were all less than 0.01, reaching statistically significant levels. Thus, the items retained in the CR-PPOS had good discriminative power.

### ***Formal study***

#### ***Participants***

Six hundred and fifty-six eligible questionnaires out of 792 participants were retrieved in this stage, with a valid response rate of 82.83%. One hundred and sixteen physicians and 540 patients were included. Respondents' demographic information is partly shown in Tables 3 and 4.

**Table 3**

Physicians' demographic characteristics (partly) and CR-PPOS scores

| Demographic characteristics | Number (percentage) | Caring subscale | Sharing subscale | CR-PPOS total |
|-----------------------------|---------------------|-----------------|------------------|---------------|
|                             |                     |                 |                  |               |

| Demographic characteristics | Number (percentage) | Caring subscale        | Sharing subscale | CR-PPOS total |           |           |
|-----------------------------|---------------------|------------------------|------------------|---------------|-----------|-----------|
| <b>Gender</b>               |                     |                        |                  |               |           |           |
| * p<0.0                     |                     |                        |                  |               |           |           |
| 5                           | Male                | 43 (37.1%)             | 4.75±0.95        | 2.81±0.79     | 3.62±0.62 |           |
| 9                           | Female              | 73 (62.9%)             | 4.68±0.74        | 3.01±0.77     | 3.68±0.57 |           |
| 11                          | <b>Table</b>        | P value                | 0.666            | 0.166         | 0.648     |           |
| <b>Age (Group)</b>          |                     |                        |                  |               |           |           |
| 18                          | demo                | –35                    | 50 (43.1%)       | 4.78±0.96     | 2.89±0.71 | 3.69±0.61 |
| 20                          | graph               | –50                    | 52 (44.8%)       | 4.69±0.63     | 2.92±0.85 | 3.63±0.52 |
| 22                          | ic                  | 51–                    | 10 (8.7%)        | 4.74±0.36     | 3.33±0.66 | 3.90±0.41 |
| 24                          | chara               | P value                | 0.827            | 0.247         | 0.363     |           |
| 26                          | cteris              |                        |                  |               |           |           |
| 28                          | tics                |                        |                  |               |           |           |
| <b>Education</b>            |                     |                        |                  |               |           |           |
| 30                          | (partl              |                        |                  |               |           |           |
| 32                          | y)                  | Senior school or below | 2 (1.7%)         | 4.20±0.00     | 3.00±0.17 | 3.41±0.14 |
| 34                          | and                 | College                | 71 (61.2%)       | 4.69±0.87     | 3.04±0.76 | 3.69±0.64 |
| 36                          | CR-P                | Postgraduate           | 42 (36.2%)       | 4.78±0.75     | 2.75±0.80 | 3.61±0.51 |
| 38                          | POS                 | P value                | 0.572            | 0.161         | 0.672     |           |
| 40                          | score               |                        |                  |               |           |           |
| 42                          | s                   |                        |                  |               |           |           |
| <b>Marriage status</b>      |                     |                        |                  |               |           |           |
| 45                          |                     | Married                | 89 (76.7%)       | 4.69±0.76     | 2.91±0.77 | 3.64±0.53 |
| 47                          |                     | Unmarried              | 26 (22.4%)       | 4.88±0.82     | 3.08±0.74 | 3.82±0.61 |
| 49                          |                     | P value                | 0.270            | 0.318         | 0.149     |           |

| <b>Gender</b>                |             |           |           |           |
|------------------------------|-------------|-----------|-----------|-----------|
| Male                         | 195 (36.1%) | 4.11±0.95 | 3.17±0.74 | 3.49±0.71 |
| Female                       | 330 (61.1%) | 4.07±0.96 | 3.09±0.77 | 3.44±0.69 |
| P value                      |             | 0.574     | 0.295     | 0.468     |
| <b>Age (Group)</b>           |             |           |           |           |
| -35                          | 175 (32.4%) | 4.24±0.91 | 3.32±0.68 | 3.59±0.67 |
| -50                          | 102 (18.9%) | 4.00±1.00 | 3.02±0.83 | 3.37±0.75 |
| -65                          | 129 (23.9%) | 3.93±1.02 | 3.00±0.76 | 3.35±0.72 |
| 66-                          | 107 (19.8%) | 4.14±0.86 | 3.12±0.77 | 3.50±0.64 |
| P value                      |             | 0.034*    | 0.001*    | 0.009*    |
| <b>Education</b>             |             |           |           |           |
| Primary school or below      | 39 (7.2%)   | 3.93±1.00 | 2.97±0.81 | 3.29±0.78 |
| Junior school                | 112 (20.7%) | 3.89±0.95 | 2.99±0.77 | 3.29±0.67 |
| Senior school                | 162 (30.0%) | 4.06±0.95 | 3.12±0.71 | 3.46±0.69 |
| College or above             | 203 (37.6%) | 4.26±0.93 | 3.23±0.80 | 3.59±0.70 |
| P value                      |             | 0.007*    | 0.030*    | 0.002*    |
| <b>Personal income (CNY)</b> |             |           |           |           |
| <1500                        | 23 (4.3%)   | 3.91±0.93 | 2.96±0.83 | 3.27±0.61 |
| -3000                        | 105 (19.4%) | 3.83±1.02 | 2.96±0.83 | 3.23±0.77 |
| -5000                        | 192 (35.6%) | 4.14±0.95 | 3.16±0.79 | 3.51±0.71 |
| -10000                       | 115 (21.3%) | 4.17±0.94 | 3.13±0.68 | 3.54±0.63 |
| 10000-                       | 70 (13.0%)  | 4.11±0.97 | 3.26±0.73 | 3.48±0.73 |



|                                    |             |           |           |           |
|------------------------------------|-------------|-----------|-----------|-----------|
| P value                            |             | 0.048*    | 0.086     | 0.006*    |
| <b>Experience as medical staff</b> |             |           |           |           |
| Yes                                | 27 (5.0%)   | 3.67±1.07 | 2.84±0.76 | 3.12±0.80 |
| No                                 | 241 (44.6%) | 4.05±1.00 | 3.22±0.75 | 3.46±0.75 |
| P value                            |             | 0.071     | 0.013*    | 0.028*    |

\*p<0.05

### ***Comparison of physicians' and patients' CR-PPOS scores***

The physicians received an average CR-PPOS score of 3.66±0.59, and the patients' average score was significantly lower (3.46±0.70). The physicians scored higher in Caring (4.71±0.82 vs. 4.08±0.95), while the patients scored higher in Sharing (3.13±0.76 vs. 2.94±0.78). The differences were all statistically significant (p<0.05).

### ***Demographic characteristics and CR-PPOS scores***

The scores of physicians and patients with distinct demographic characteristics were compared, as partly listed in Tables 3 and 4. Both patients' age and education level were significantly associated with their scores on the Caring subscale(p<0.05), the Sharing subscale(p<0.001) and the total CR-PPOS(p<0.01). While patients' income was only significantly associated with the Caring subscale score(p<0.05) and the total CR-PPOS score(p<0.01). Besides, patients' experience as medical staff was likely to gain their scores on the Sharing subscale(p<0.05) and the total CR-PPOS(p<0.05). However, no associations of such were traced among physicians.

### ***Physicians' burnout and CR-PPOS scores***

The burnout level of physicians was measured by the MBI-GS. According to the data,

1  
2  
3 the group of “relatively severe” (scoring 3–5) and the group of “extremely severe”  
4 (scoring 5 or above) were merged as a “severe” group (scoring 3 or above), compared  
5 with the “light” group (scoring 3 or below). Physicians who reported “severe” burnout  
6 scored significantly lower in both the Caring subscale and the total scale than those  
7 reporting “light” burnout.  
8  
9

### 10 11 12 13 ***Physicians’ medical communication competency and CR-PPOS scores*** 14

15  
16 Ninety-nine percent of physicians completed the MCCS, which aimed to assess the  
17 medical communication competency of both physicians and patients. Although  
18 physicians were normally assessed by their patients using MCCS, we transformed this  
19 into a self-reported scale for physicians in this study. The results indicated that,  
20 although the scores of the four dimensions within MCCS were related, no correlation  
21 was found between the MCCS scores and the CR-PPOS scores as well as its  
22 subscales.  
23  
24  
25  
26  
27  
28  
29

### 30 31 ***Patients’ anxiety and depression and CR-PPOS scores*** 32

33  
34 Five hundred and two patients finished the HADS, an instrument for rapidly screening  
35 anxiety and depressive symptoms among clinic physicians and patients. Patients got a  
36 mean score of 11.57 in the anxiety subscale and 11.77 in the depression subscale.  
37 Three hundred nine patients (57.2%) were determined to be anxiety-positive, and two  
38 hundred and seventy seven (51.3%) were determined as depression-positive.  
39  
40  
41  
42  
43

44 As anxiety and depressive symptoms were highly comorbid, which was also proven in  
45 our study ( $r_s=0.520$ ), a two-way ANOVA was performed as the first stage to explore  
46 whether an interaction effect existed. It turned out that there was no interaction effect  
47 of anxiety and depression. Anxiety was found to lead to a decrease in patients’ scores  
48 on both the Caring subscale( $p<0.05$ ) and the total CR-PPOS( $p<0.05$ ). However,  
49 patients’ scores on neither the total scale nor the subscales seemed to be influenced by  
50 their depressive symptoms.  
51  
52  
53  
54  
55  
56  
57  
58  
59  
60

### *Patients' health literacy, PCCS, and CR-PPOS scores*

Using the three-item Rapid Health Literacy Scale, no statistical difference was found in the total CR-PPOS score and the two subscale scores between the poor literacy group and the adequate literacy group, while patients' health literacy scores showed a significantly positive correlation with their Sharing subscale scores ( $r_s=0.112$ ). Similarly, patients' confidence in medical communication measured by PCCS was inversely correlated with their scores on the Sharing subscale ( $r_s=-0.261$ ). In the following partial correlation tests, the correlation between PCCS and the Sharing subscale score remained significant after controlling for the health literacy score, while no correlation existed between the health literacy score and the Sharing subscale score after controlling for PCCS.

### *Multivariable analysis*

After testing the feasibility, MLR was employed to detect the factors that might exert influence on physicians' and patients' preferences toward patient-centered communication. The results showed that the total burnout level might be the influential factor for physicians in Caring and total CR-PPOS scores, and more factors impacted patients' preference toward patient-centered communication in different dimensions (Table 5).

**Table 5**

Variables influencing CR-PPOS scores

| Dimension         | Variables        | B      | 95% CI           | P     |
|-------------------|------------------|--------|------------------|-------|
| <b>Physicians</b> |                  |        |                  |       |
| Caring subscale   | Total burn-out   | -0.417 | (-0.801, -0.033) | 0.034 |
|                   | Sharing subscale |        |                  |       |
| CR-PPOS total     | Total burn-out   | -0.341 | (-0.611, -0.071) | 0.014 |
| <b>Patients</b>   |                  |        |                  |       |

|                  |                                     |        |                  |        |
|------------------|-------------------------------------|--------|------------------|--------|
| Caring subscale  | Age (Group)                         | -0.292 | (-0.499, -0.086) | 0.006  |
|                  | Education                           | 0.251  | (0.079, 0.423)   | 0.005  |
|                  | Experience as medical staff         | 0.538  | (0.046, 1.029)   | 0.032  |
| Sharing subscale | Age (Group)                         | -0.202 | (-0.361, -0.043) | 0.013  |
|                  | Education                           | 0.169  | (0.039, 0.299)   | 0.011  |
|                  | Experience as medical staff         | 0.481  | (0.109, 0.852)   | 0.012  |
|                  | Marriage status                     | -0.336 | (-0.666, -0.006) | 0.046  |
|                  | Confidence in medical communication | -0.298 | (-0.451, -0.146) | <0.001 |
| CR-PPOS total    | Age (Group)                         | -0.242 | (-0.396, -0.087) | 0.001  |
|                  | Education                           | 0.222  | (0.093, 0.350)   | 0.001  |
|                  | Experience as medical staff         | 0.476  | (0.111, 0.842)   | 0.011  |

### Discussion

Although the PPOS has been widely used in various languages, only a few studies have systematically tested its psychometric property while applying it<sup>[33-35]</sup>, and no related results have been reported in China yet. This study showed that neither the ICC of the overall 18-item C-PPOS nor its two subscales were above 0.7, which was comparable to the existing research but still not good enough. Deletion of items 9 and 17 improved the Cronbach's  $\alpha$ , which is consistent with a study conducted in Sri Lanka<sup>[36]</sup>. After modifying, the two subscales of the 11-item PPOS were well separated in a fixed-factor EFA, with better indexes than prior similar studies, and the overall scale validity was reconfirmed by CFA. Taking into account the test-retest reliability and discriminative power, the 11-item CR-PPOS obtained better psychometric property than the original 18-item scale; thus it is considered to have

1  
2  
3 greater applicability in the Chinese population.  
4

5  
6 Using the 11-item CR-PPOS, physicians and patients indicated similar trends in the  
7  
8 achieved scores. In the overall scale, they both obtained medium scores (around the  
9  
10 median value of 3.5), and they both had relatively high Caring scores (over 4.0) and  
11  
12 low Sharing scores (around 3.0 or below). This indicated that, although physicians  
13  
14 and patients generally showed a medium level of patient-centeredness in clinical  
15  
16 communication, they expressed higher preferences toward caring from a  
17  
18 biopsychosocial perspective than shared information and involvement in decision  
19  
20 making. Although the physicians' data is still absent in China, the 95% confidence  
21  
22 interval of mean score of patients in this study slightly overlapped that of the prior  
23  
24 study<sup>[21]</sup>, which implied that Chinese patients might express similar preferences  
25  
26 toward patient-centered communication, regardless of the regions they were living in.  
27  
28 The differences between the scores of physicians and patients, however, may still  
29  
30 prompt the gap in Chinese physicians and patients regarding their understanding and  
31  
32 expectations in clinical communication. Comparing the data of this study with that  
33  
34 from abroad, the majority showed a similar pattern that physicians were more  
35  
36 patient-centered in Caring than in Sharing, but there were still two exceptions for the  
37  
38 surveys conducted in Portugal and Australia, indicating opposite results<sup>[37,38]</sup>, which  
39  
40 may be due to the difference in physician training modes and local health systems.  
41  
42 Thus, further research is needed to determine the reasons for such a distinction.

43  
44 Preference toward patient-centered communication, as measured by the PPOS, is  
45  
46 influenced by both personal characteristics and social environmental factors. This  
47  
48 study made the first attempt to detect the potential influential factors of  
49  
50 patient-centered communication among Chinese physicians. The results showed no  
51  
52 association between PPOS scores and a series of factors, including gender, age,  
53  
54 education level, career length, and type of setting. These results were consistent with  
55  
56 several prior studies in other countries, except gender differences, for female  
57  
58 physicians scored significantly higher than male colleagues in some studies<sup>[39,40]</sup>.  
59  
60 Apart from these factors, which were frequently mentioned in the existing research,

1  
2  
3 we found that burnout level might exert impact on physicians' PPOS total score as  
4 well as their Caring subscale score, indicating that physicians with a higher total  
5 burnout level were generally less likely to be patient-centered in clinical  
6 communication. Although we assumed that poor communication ability may relate to  
7 a lower preference for patient-centeredness in communication, no link was found  
8 between physicians' medical communication competency measured by MCCS and  
9 their PPOS scores in this study.  
10  
11

12  
13  
14  
15  
16  
17 Ting<sup>[20]</sup> reported that age and education mainly influence Chinese patients' overall  
18 preference on patient-centered communication. In this study, younger and/or  
19 better-educated patients also expressed a higher preference for patient-centered  
20 communication in both the Caring and Sharing dimensions. Although some studies  
21 have reported a gender difference<sup>[33,36,41,42]</sup>, it seems that in case of Chinese patients,  
22 age and education level, rather than gender, contribute to the different preferences  
23 toward patient-centered communication. Meanwhile, the type of setting and social  
24 economic status are not considered as influential factors, which is controversial<sup>[42]</sup>. It  
25 was found that experience as medical staff decreased the extent to which patients  
26 wanted a patient-centered communication style. One plausible explanation is that  
27 those who had worked as medical staff had obtained a more comprehensive  
28 understanding of how things were inside the hospital than those who had not. Thus,  
29 they subconsciously lowered their expectation of a patient-centered manner in  
30 communication, which might raise demand for physicians, due to their sympathy  
31 toward the doctor groups for their daily heavy workload. Additionally, although  
32 anxiety was detected as an influential factor in single factor analysis, the final  
33 regression model showed patients' PPOS scores were irrelevant to their anxiety and  
34 depression status. There is also a need to further probe the role of patient  
35 communication confidence, as well as its seeming mediation effect on the relationship  
36 between patients' health literacy and preference for shared information and decision  
37 making.  
38  
39  
40  
41  
42  
43  
44  
45  
46  
47  
48  
49  
50  
51  
52  
53  
54  
55  
56  
57

### 58 **Conclusion**

1  
2  
3 The 11-item C-PPOS was developed with systematical psychometric property  
4 revision in this study. Physicians and patients were generally more likely to be  
5 patient-centered in medical communication regarding overall biopsychosocial care  
6 than shared information and decision making, but there were still significant gaps  
7 between physicians and patients on the extent to which they prefer this type of  
8 communication. Relieving of burnout would be beneficial for physicians' health, as  
9 well as for an increase in patient-centered communication. Patients with young age,  
10 high education level, and medical staff experience are inclined to be more  
11 patient-centered overall in clinical communication.  
12  
13  
14  
15  
16  
17  
18  
19

### 20 21 ***Practice implications***

22  
23  
24 The CR-PPOS is a well-tested instrument that can be applied to the Chinese context to  
25 measure the preference toward patient-centered communication of physicians and  
26 patients. Physicians should learn to recognize patients' preferences and expectations  
27 in clinical communication and adapt specific communication strategies to different  
28 individuals.  
29  
30  
31  
32

33  
34 **Competing interests:** All authors have completed the ICMJE uniform disclosure  
35 form at [www.icmje.org/coi\\_disclosure.pdf](http://www.icmje.org/coi_disclosure.pdf) and declare: Jie Wang had financial  
36 support from the China Postdoctoral Science Foundation for the submitted work, Fan  
37 Wang has received funds from Shanghai Health and Family Planning Commission; no  
38 financial relationships with any organizations that might have an interest in the  
39 submitted work in the previous three years; no other relationships or activities that  
40 could appear to have influenced the submitted work."  
41  
42  
43  
44  
45  
46  
47

48 **Ethics committee approval information:** The study was approved by Fudan  
49 University School of Public Health Institutional Review Board (No.  
50 IRB#2015-12-0575).  
51  
52  
53  
54

55 **Contributors:** Jie Wang granted research funding, engaged in study design and data  
56 analysis, and was the main drafter of the Introduction and Discussion sections; Runyu  
57  
58  
59  
60

1  
2  
3 Zou led study design, data collection, data analysis, and drafted the Method, and  
4 Results sections of the manuscript; Hua Fu and Fan Wang were the co-principal  
5 investigators of this project, granting research funding and mentoring study design,  
6 data collection, and article revision. They also issued final approval for submission;  
7 Haihong Qian and Yueren Yan contributed to data collection and refining the article.  
8 All authors have approved the final version of this manuscript.

9  
10  
11  
12  
13  
14  
15  
16 **Acknowledgments:** We appreciate Professor Edward Krupat from Harvard  
17 University for his generous authorization to use and revise PPOS for the Chinese  
18 context. We are also grateful to the coordinators of the collaborating hospitals for their  
19 kind assistance.

20  
21  
22  
23  
24 **Funding:** This work was supported by the first-class General Financial Grant from  
25 the China Postdoctoral Science Foundation [grant number 2015M580283] and  
26 Construction of the key disciplines of the fourth round public health three-year action  
27 plan of Shanghai Health and Family Planning Commission [grant number  
28 15GWZK1001].

29  
30  
31  
32  
33  
34  
35 Technical appendix, statistical code, and dataset available from the Dryad repository,  
36 DOI: [include DOI for dataset here].

37  
38  
39  
40  
41  
42  
43  
44  
45  
46  
47  
48  
49  
50  
51  
52  
53  
54  
55  
56  
57  
58  
59  
60  
Detail has been removed from this case description/these case descriptions to ensure  
anonymity. The editors and reviewers have seen the detailed information available  
and are satisfied that the information backs up the case the authors are making.

## Reference

- 1 Balint E, Ball D, Hare M. Training medical students in patient-centered medicine, *Compr Psychiatry* 1969;10:249-58.
- 2 Hirono I, Hideki H, Takahiro K. The evolving concept of “patient-centeredness” in patient-physician communication research, *Soc Sci Med* 2013;96:147-53.
- 3 Institute of Medicine. Crossing the quality chasm: a new health system for the 21st



- 1  
2  
3 century. Washington (DC):National Academies Press 2001:39-40.
- 4  
5 4 Mohammed A, Mannan F, Chaudhry Z, et al. Quality of care in university hospitals  
6  
7 in Saudi Arabia: a systematic review. *BMJ Open*2016;6(2):e008988.
- 8  
9 5 Catro EM, van Regenmortel T, Vanhaecht K, et al. Patient empowerment, patient  
10  
11 participation and patient-centeredness in hospital care: A concept analysis based on a  
12  
13 literature review. *Patient Educ Couns*2016;99:1923-39.
- 14  
15 6 Stewart M, Brown JB, Weston WW, et al. Patient-centered medicine: transforming  
16  
17 the clinical method, 2nd edn. United Kingdom: Radcliffe Medical Press 2003:5-16.
- 18  
19 7 Hudon C, Fortin M, Haggerty JL, et al. Measuring patients' perceptions of  
20  
21 patient-centered care: a systematic review of tools for family medicine. *Ann Fam  
22  
23 Med*2011;9:155-64.
- 24  
25 8 Epstein RM, Franks P, Fiscella K, et al. Measuring patient-centered communication  
26  
27 in patient-physician consultations: theoretical and practical issues. *Soc Sci  
28  
29 Med*2005;61:1516-28.
- 30  
31 9 Bensing JM, Verhaak PF, van Dulmen AM, et al. Communication: the royal  
32  
33 pathway to patient-centered medicine. *Patient Educ Couns*2000;39:1-3.
- 34  
35 10 Mead N, Bower P. Patient-centeredness: a conceptual framework and review of the  
36  
37 empirical literature. *Soc Sci Med*2000;51:1087-10.
- 38  
39 11 Taylor K. Paternalism, participation and partnership-the evolution of  
40  
41 patient-centeredness in the consultation. *Patient Educ Couns*2009;74:150-55.
- 42  
43 12 Greenfield S, S. Kaplan, J. Ware, E.M. Yano, H. Frank, Patients' participation in  
44  
45 medical care. *J Gen Intern Med*1988;88:448-57.
- 46  
47 13 Marinker M. From compliance to concordance: achieving shared goals in medicine  
48  
49 taking. *Brit Med J*1997;314:747-8.
- 50  
51 14 Schiavo R. Health Communication: From Theory to Practice, 2<sup>nd</sup> edn. United  
52  
53 States: Jossay-Bass 2013:195-96.
- 54  
55 15 Morris MA, Clayman ML, Peters KJ, et al. Patient-centered communication  
56  
57 strategies for patients with aphasia: discrepancies between what patients want and  
58  
59 what physicians do. *Disabil Health J*2015;8:208-15.
- 60  
16 Krupat E, Hiam CM, Fleming MZ, et al. Patient-centeredness and its correlates

- 1  
2  
3 among first year medical students. *Int J Psychiatry Med*1999;29:347-56.
- 4  
5 17 Kim J. Differences in attitude toward patient-centeredness in patients and  
6  
7 physicians. *Korean J Med Educ*2013;25:149-56.
- 8  
9 18 Ishikawa I, Eto M, Kitamura K, et al. Resident physicians' attitudes and  
10  
11 confidence in communicating with patients: A pilot study at a Japanese University  
12  
13 hospital. *Patient Educ Couns*2014;96:361-66.
- 14  
15 19 Tsimtsiou Z, Kirana PS, Hatzichristou D. Determinants of patients' attitudes  
16  
17 toward patient-centered care: A cross-sectional study in Greece. *Patient Educ*  
18  
19 *Couns*2014;97:391-95.
- 20  
21 20 Dockens AL, Bellon-Harn ML, Manchaiah V. Preference to patient-centeredness in  
22  
23 pre-service speech and hearing sciences students: a cross-sectional study. *J Audiol*  
24  
25 *Otol*2016;20:73-9.
- 26  
27 21 Ting X, Yong B, Yin L, et al. Patient perception and the barriers to practicing  
28  
29 patient-centered communication: A survey and in-depth interview of Chinese patients  
30  
31 and physicians. *Patient Educ Couns*2016;99:364-69.
- 32  
33 22 Krupat E, Rosenkranz SL, Yeager CM, et al. The practice orientations of  
34  
35 physicians and patients: the effect of doctor-patient congruence on satisfaction.  
36  
37 *Patient Educ Couns*2000;39:49-59.
- 38  
39 23 Moore M. What does patient-centered communication mean in Nepal? *Med*  
40  
41 *Educ*2008;42:18-26.
- 42  
43 24 Hair Jr JF, Black WC, Babin BJ, et al. *Multivariate Data Analysis*, 7th edn. Beijing:  
44  
45 China Machine Press 2011:100-123.
- 46  
47 25 Raosoft Inc. Sample size calculation [online]. [www.raosoft.com/samplesize.html](http://www.raosoft.com/samplesize.html).
- 48  
49 26 Tran A, Haidet P, Street R, et al. Empowering communication: a community-based  
50  
51 intervention for patients. *Patient Educ Couns*2004;52:113-21.
- 52  
53 27 Chew LD, Bradley KA, Boyko EJ. Brief questions to identify patients with  
54  
55 inadequate health literacy. *Fam Med*2004;36:588-94.
- 56  
57 28 Cegala DJ, Coleman MT, Warisse J. The development and partial test of the  
58  
59 Medical Communication Competence Scale (MCCS). *J Health*  
60  
*Commun*1998;10:261-88.

- 1  
2  
3 29 Ponterotto JG, Ruckdeschel DE. An overview of coefficient alpha and a reliability  
4 matrix for estimating adequacy of internal consistency coefficients with psychological  
5 research measures. *Percept Mot Skills*2007;105:997-1014.  
6  
7  
8  
9 30 Osborne JW, Costello AB. Best practices in exploratory factor analysis: four  
10 recommendations for getting the most from your analysis. *Pract Assess Res Eval*  
11 2005;10:1-9.  
12  
13  
14 31 Brown TA. Confirmatory factor analysis for applied research, 2<sup>nd</sup> edn. New York:  
15 The Guilford Press 2015:67-73.  
16  
17  
18 32 Backhoff E, Larrazolo N, Rosas M. The level of difficulty and discrimination  
19 power of Basic Knowledge and Skill Examination (EXHCOBA). *Revista Electrónica*  
20 *de Investigación Educativa* 2000;2(1).  
21 [www.researchgate.net/publication/266332601\\_The\\_Level\\_of\\_Difficulty\\_and\\_Discrimination\\_Power\\_of\\_the\\_Basic\\_Knowledge\\_and\\_Skills\\_Examination\\_EXHCOBA.htm](http://www.researchgate.net/publication/266332601_The_Level_of_Difficulty_and_Discrimination_Power_of_the_Basic_Knowledge_and_Skills_Examination_EXHCOBA.htm)  
22 (accessed 7 Mar 2017).  
23  
24  
25  
26  
27  
28  
29 33 Krupat E, Yeager CM, Putnam S. Patient role orientations, doctor-patient fit, and  
30 visit satisfaction. *Psychol Health*2000;15:707-19.  
31  
32  
33 34 Pereira CM, Amaral CF, Ribeiro MM, et al. Cross-cultural validation of the  
34 Patient-Practitioner Orientation Scale. *Patient Educ Couns*2013;91:37-43.  
35  
36  
37 35 Kiessling C, Fabry G, Rudolf Fisher M, et al. German translation and construct  
38 validation of the Patient-Provider Orientation Scale(PPOS-D12). *Psychother*  
39 *Psychosom Med Psychol*2014;64:122-27.  
40  
41  
42 36 Mudiyanse RM, Pallegame RW, Jayalath T, et al. Translation and validation of the  
43 Patient-Practitioner Orientation Scale in Sri Lanka. *Educ Health(Ablington)*  
44 2015;28:35-40.  
45  
46  
47  
48 37 Laplante-Levesque A, Hickson L, Grenness C. An Australian survey of  
49 audiologists' preferences for patient-centeredness. *Int J Audiol*2014;53:S76-82.  
50  
51  
52 38 Manchiah V, Gomersall PA, Tome D, et al. Audiologists' preferences for  
53 patient-centeredness: a cross sectional questionnaire study of cross-cultural  
54 differences and similarities among professionals in Portugal, India and Iran. *BMJ*  
55 *Open*2014;4:e005915.  
56  
57  
58  
59  
60

1  
2  
3 39 Abiola T, Udofia O, Abdullahi AT. Patient-doctor relationship: the practice  
4 orientations of doctors in Kano. *Niger J Clin Pract*2014;17:241-47.  
5

6  
7 40 Mann KJ, Hoffman A, Miller D, et al. The effect of a patient- and family-centered  
8 care curriculum on pediatric residents' patient-centeredness. *J Grad Med*  
9 *Educ*2013;5:36-40.  
10

11  
12 41 Krupat E, Hsu J, Irish J, et al. Matching patients and practitioners based on beliefs  
13 about care: Results of a randomized controlled trial. *Am J Manag Care*  
14 2004;10:814-22.  
15

16  
17 42 Lau SR, Christensen ST, Andreason JT. Patients' preferences for patient-centered  
18 communication: a survey from an outpatient department in rural Sierra Leone. *Patient*  
19 *Educ Couns*2013;93:312-18.  
20

21  
22 43 Little P, Everitt H, Williamson I, et al. Preferences of patients for patient-centered  
23 approach to consultation in primary care: observational study. *BMJ*2001;322:468-72.  
24  
25  
26  
27  
28  
29  
30  
31  
32  
33  
34  
35  
36  
37  
38  
39  
40  
41  
42  
43  
44  
45  
46  
47  
48  
49  
50  
51  
52  
53  
54  
55  
56  
57  
58  
59  
60

STROBE 2007 (v4) Statement—Checklist of items that should be included in reports of *cross-sectional studies*

| Section/Topic             | Item # | Recommendation                                                                                                                                                                       | Reported on page # |
|---------------------------|--------|--------------------------------------------------------------------------------------------------------------------------------------------------------------------------------------|--------------------|
| Title and abstract        | 1      | (a) Indicate the study’s design with a commonly used term in the title or the abstract                                                                                               | 1                  |
|                           |        | (b) Provide in the abstract an informative and balanced summary of what was done and what was found                                                                                  | 2                  |
| <b>Introduction</b>       |        |                                                                                                                                                                                      |                    |
| Background/rationale      | 2      | Explain the scientific background and rationale for the investigation being reported                                                                                                 | 3,4                |
| Objectives                | 3      | State specific objectives, including any prespecified hypotheses                                                                                                                     | 5                  |
| <b>Methods</b>            |        |                                                                                                                                                                                      |                    |
| Study design              | 4      | Present key elements of study design early in the paper                                                                                                                              | 5,6,7              |
| Setting                   | 5      | Describe the setting, locations, and relevant dates, including periods of recruitment, exposure, follow-up, and data collection                                                      | 6,7                |
| Participants              | 6      | (a) Give the eligibility criteria, and the sources and methods of selection of participants                                                                                          | 6,7                |
| Variables                 | 7      | Clearly define all outcomes, exposures, predictors, potential confounders, and effect modifiers. Give diagnostic criteria, if applicable                                             | 7                  |
| Data sources/ measurement | 8*     | For each variable of interest, give sources of data and details of methods of assessment (measurement). Describe comparability of assessment methods if there is more than one group | 7,8                |
| Bias                      | 9      | Describe any efforts to address potential sources of bias                                                                                                                            | 7                  |
| Study size                | 10     | Explain how the study size was arrived at                                                                                                                                            | 7                  |
| Quantitative variables    | 11     | Explain how quantitative variables were handled in the analyses. If applicable, describe which groupings were chosen and why                                                         | 7                  |
| Statistical methods       | 12     | (a) Describe all statistical methods, including those used to control for confounding                                                                                                | 8                  |
|                           |        | (b) Describe any methods used to examine subgroups and interactions                                                                                                                  | 8                  |
|                           |        | (c) Explain how missing data were addressed                                                                                                                                          | 7,                 |
|                           |        | (d) If applicable, describe analytical methods taking account of sampling strategy                                                                                                   | 8                  |
|                           |        | (e) Describe any sensitivity analyses                                                                                                                                                |                    |
| <b>Results</b>            |        |                                                                                                                                                                                      |                    |

|                          |     |                                                                                                                                                                                                              |            |
|--------------------------|-----|--------------------------------------------------------------------------------------------------------------------------------------------------------------------------------------------------------------|------------|
| Participants             | 13* | (a) Report numbers of individuals at each stage of study—eg numbers potentially eligible, examined for eligibility, confirmed eligible, included in the study, completing follow-up, and analysed            | 9,12       |
|                          |     | (b) Give reasons for non-participation at each stage                                                                                                                                                         | 9,12       |
|                          |     | (c) Consider use of a flow diagram                                                                                                                                                                           |            |
| Descriptive data         | 14* | (a) Give characteristics of study participants (eg demographic, clinical, social) and information on exposures and potential confounders                                                                     | 9,10,12,13 |
|                          |     | (b) Indicate number of participants with missing data for each variable of interest                                                                                                                          |            |
| Outcome data             | 15* | Report numbers of outcome events or summary measures                                                                                                                                                         | 9-17       |
| Main results             | 16  | (a) Give unadjusted estimates and, if applicable, confounder-adjusted estimates and their precision (eg, 95% confidence interval). Make clear which confounders were adjusted for and why they were included | 19         |
|                          |     | (b) Report category boundaries when continuous variables were categorized                                                                                                                                    |            |
|                          |     | (c) If relevant, consider translating estimates of relative risk into absolute risk for a meaningful time period                                                                                             |            |
| Other analyses           | 17  | Report other analyses done—eg analyses of subgroups and interactions, and sensitivity analyses                                                                                                               |            |
| <b>Discussion</b>        |     |                                                                                                                                                                                                              |            |
| Key results              | 18  | Summarise key results with reference to study objectives                                                                                                                                                     | 18,21      |
| Limitations              | 19  | Discuss limitations of the study, taking into account sources of potential bias or imprecision. Discuss both direction and magnitude of any potential bias                                                   | 3          |
| Interpretation           | 20  | Give a cautious overall interpretation of results considering objectives, limitations, multiplicity of analyses, results from similar studies, and other relevant evidence                                   | 18-21      |
| Generalisability         | 21  | Discuss the generalisability (external validity) of the study results                                                                                                                                        | 21         |
| <b>Other information</b> |     |                                                                                                                                                                                                              |            |
| Funding                  | 22  | Give the source of funding and the role of the funders for the present study and, if applicable, for the original study on which the present article is based                                                | 22         |

\*Give information separately for cases and controls in case-control studies and, if applicable, for exposed and unexposed groups in cohort and cross-sectional studies.

**Note:** An Explanation and Elaboration article discusses each checklist item and gives methodological background and published examples of transparent reporting. The STROBE checklist is best used in conjunction with this article (freely available on the Web sites of PLoS Medicine at <http://www.plosmedicine.org/>, Annals of Internal Medicine at <http://www.annals.org/>, and Epidemiology at <http://www.epidem.com/>). Information on the STROBE Initiative is available at [www.strobe-statement.org](http://www.strobe-statement.org).

# BMJ Open

## Measuring the preference toward patient-centered communication with the Chinese-revised Patient-Practitioner Orientation Scale: A study among physicians and patients in clinical settings in Shanghai, China

|                                 |                                                                                                                                                                                                                                                                                                                                                                                                                                                                                                                                                                                                                                                                                           |
|---------------------------------|-------------------------------------------------------------------------------------------------------------------------------------------------------------------------------------------------------------------------------------------------------------------------------------------------------------------------------------------------------------------------------------------------------------------------------------------------------------------------------------------------------------------------------------------------------------------------------------------------------------------------------------------------------------------------------------------|
| Journal:                        | <i>BMJ Open</i>                                                                                                                                                                                                                                                                                                                                                                                                                                                                                                                                                                                                                                                                           |
| Manuscript ID                   | bmjopen-2017-016902.R1                                                                                                                                                                                                                                                                                                                                                                                                                                                                                                                                                                                                                                                                    |
| Article Type:                   | Research                                                                                                                                                                                                                                                                                                                                                                                                                                                                                                                                                                                                                                                                                  |
| Date Submitted by the Author:   | 27-May-2017                                                                                                                                                                                                                                                                                                                                                                                                                                                                                                                                                                                                                                                                               |
| Complete List of Authors:       | Wang, Jie; Key Laboratory of Public Health Safety, Ministry of Education, School of Public Health, Fudan University<br>Zou, Runyu; Erasmus University Medical Center, Department of Epidemiology, Department of Child and Adolescent Psychiatry<br>Fu, Hua; Key Laboratory of Public Health Safety, Ministry of Education, School of Public Health, Fudan University<br>Qian, Haihong; School of Basic Medicine Science, Fudan University<br>Yan, Yueren; Key Laboratory of Public Health Safety, Ministry of Education, School of Public Health, Fudan University<br>Wang, Fan; Key Laboratory of Public Health Safety, Ministry of Education, School of Public Health, Fudan University |
| <b>Primary Subject Heading</b>: | Communication                                                                                                                                                                                                                                                                                                                                                                                                                                                                                                                                                                                                                                                                             |
| Secondary Subject Heading:      | Patient-centred medicine, Health services research                                                                                                                                                                                                                                                                                                                                                                                                                                                                                                                                                                                                                                        |
| Keywords:                       | Patient-centered communication, Clinical setting, Chinese, Scale                                                                                                                                                                                                                                                                                                                                                                                                                                                                                                                                                                                                                          |
|                                 |                                                                                                                                                                                                                                                                                                                                                                                                                                                                                                                                                                                                                                                                                           |

SCHOLARONE™  
Manuscripts

1  
2  
3  
4 **1 Measuring the preference toward patient-centered communication**  
5  
6 **2 with the Chinese-revised Patient-Practitioner Orientation Scale: A**  
7  
8  
9 **3 study among physicians and patients in clinical settings in Shanghai,**  
10  
11 **4 China**

12  
13 Jie Wang<sup>a</sup>, <sup>1</sup>Runyu Zou<sup>b</sup>, Hua Fu<sup>a</sup>, Haihong Qian<sup>c</sup>, Yueren Yan<sup>a</sup>, Fan Wang<sup>a\*</sup>  
14  
15

16  
17 <sup>a</sup> *Key Laboratory of Public Health Safety, Ministry of Education, School of Public*  
18 *Health, Fudan University, Shanghai, China.*

19 <sup>b</sup> *Department of Epidemiology, Department of Child and Adolescent Psychiatry,*  
20 *Erasmus University Medical Center, Rotterdam, the Netherlands.*

21 <sup>c</sup> *School of Basic Medicine Science, Fudan University, Shanghai, China.*  
22  
23

24  
25  
26  
27  
28  
29  
30  
31  
32  
33  
34  
35  
36  
37  
38  
39  
40  
41  
42  
43  
44  
45  
46  
47  
48  
49  
50  
51  
52  
53  
54  
55  
56  
57  
58  
59  
60

13 Words count: 3994 (excluding title, abstract, article summary, competing interests,  
14 contributors, acknowledgments, funding, tables, appendix, and references)

---

<sup>1</sup> Runyu Zou as joint first author

\* Corresponding author at: P.O. Box 248, 138 Yixueyuan Road, 200032, Shanghai, China.  
E-mail address: wangfan512@126.com Tel:86-21-54237509 (F. Wang)



1  
2  
3 **Abstract**  
4

5  
6  
7 *Objectives:* The study aimed to explore the preference toward patient-centered  
8  
9 communication among physicians and patients with the Chinese-revised Patient-  
10  
11 Practitioner Orientation Scale (CR-PPOS).  
12

13  
14  
15 *Setting:* Participants were recruited in clinical settings from eight medical institutes,  
16  
17 including four community hospitals and four general hospitals, in Shanghai, China.  
18

19  
20  
21 *Design and participants:* Questionnaire-based surveys were conducted among a total  
22  
23 of 1018 physicians and patients, in two successive stages in the year of 2015.  
24

25  
26  
27 *Outcome measurements:* Analysis mainly probed (1) psychological properties of the  
28  
29 original Chinese-translated PPOS version versus the CR-PPOS (2) participants' scores  
30  
31 on the CR-PPOS and the influential factors.  
32

33  
34  
35 *Results:* Compared with the original PPOS, the 11-item CR-PPOS obtained better  
36  
37 reliability and validity indicators. Furthermore, it also showed good discriminative  
38  
39 power. Physicians and patients scored significantly differently on each subscale, as  
40  
41 well as the total scale of CR-PPOS. Scores of patients were more likely to be  
42  
43 influenced by various factors, such as age and education, compared with those of  
44  
45 physicians.  
46

47  
48  
49 *Conclusions:* The CR-PPOS is a better instrument in the Chinese context than the  
50  
51 original translated version. The congruence and divergence in the extent to which  
52  
53 patient-centered communication is preferred among Chinese physicians and patients  
54  
55 should be noted. Adapting physicians' communication strategy to patients' preference  
56  
57 based on their personal features can be an approach to improve clinical efficiency.  
58

59 **Keywords:** Patient-centered communication, Clinical setting, Chinese, Scale  
60

1  
2  
3  
4  
5  
6  
7  
8  
9  
10  
11  
12  
13  
14  
15  
16  
17  
18  
19  
20  
21  
22  
23  
24  
25  
26  
27  
28  
29  
30  
31  
32  
33  
34  
35  
36  
37  
38  
39  
40  
41  
42  
43  
44  
45  
46  
47  
48  
49  
50  
51  
52  
53  
54  
55  
56  
57  
58  
59  
60

1 *Article summary: Strengths and limitations of this study*

- 2 • Psychometric properties of PPOS were systematically assessed in Chinese  
3 context, with common indicators of reliability, validity and discriminative  
4 power.
- 5 • Preference toward patient-centered communication among Chinese physicians  
6 was simultaneously measured with that of patients using the CR- PPOS, which  
7 made it possible to make comparisons and find differences between both sides.
- 8 • The association between broader variables and participants' preference toward  
9 patient-centered communication was explored, such as burnout for physicians  
10 and health literacy for patients.
- 11 • Due to feasibility, the participants in this study were only drawn from eight  
12 clinical units in Shanghai, and sampling was not exact random, which both  
13 brought the issue on selection bias and limited generalization validity.
- 14 • Caution should be used when directly comparing scores measured by the  
15 CR-PPOS and the original PPOS, as we developed the CR-PPOS from the  
16 PPOS following a standardized statistical process, without the constraint of  
17 keeping the number of items constant.

18  
19 ***Introduction***

20 In 1969, Balint<sup>[1]</sup> was greatly influential in the development of patient-centeredness,  
21 which has been one of the most frequently discussed principles in medical practices  
22 over the past few decades<sup>[2]</sup>. It has also been regarded as one of the six core  
23 components of high-quality medical care<sup>[3]</sup>. Enhancing patient-centeredness is eagerly  
24 highlighted to improve the quality of health care delivery<sup>[4]</sup>.

25 Patient-centeredness, however, is hard to be uniformly defined<sup>[5]</sup>. And it is not for sure  
26 that patient-centeredness can be considered as a set of gestures (a combination of

1 setting, language, paralanguage, and so on), or a state of mind. Furthermore, it is  
2 uncertain whether it exists as a yearning inside the head of the physician or the patient,  
3 whether it is a set of things to do or things to think, or a compendium of things to  
4 say<sup>[6]</sup>.

5 Despite these conundrums, various conceptual models have been raised to illustrate  
6 patient-centeredness for the positive effects it brings to medical care <sup>[7,8]</sup>. And  
7 Epstein<sup>[9]</sup> further indicated that patient-centeredness could be fulfilled from three  
8 levels: interpersonal behaviors, technical intervention, and health system innovation.  
9 As a key element in interpersonal behaviors between physicians and patients,  
10 patient-centered communication has been a highly recommended model, enabling  
11 practitioners to offer care that is concordant with the patient's values, needs, and  
12 preferences, and that allows patients to become actively involved in decision making  
13 regarding their health<sup>[10,11]</sup>. Patient-centered communication contributes to building a  
14 partnership between physicians and patients, instead of the traditional paternalism<sup>[12]</sup>.  
15 Patient-centered communication has also been reported to improve a variety of  
16 patients' clinical outcomes in diverse settings, and enhance their adherence to  
17 prescription medications and other types of treatment<sup>[13,14]</sup>.

18 However, considering the cultural and contextual differences, patient-centered  
19 communication may not be universally applicable despite the benefits it  
20 offers<sup>[15]</sup>. Thus it is suggested that physicians learn patients' communication  
21 preference and then incorporate identified communication strategies into their  
22 communication style<sup>[16]</sup>. However, available instruments that aim to measure the  
23 preference toward patient-centered communication remain sparse. Originally  
24 developed by Krupat<sup>[17]</sup>, the Patient-Practitioner Orientation Scale (PPOS),  
25 embracing the four elements model of patient-centeredness, has been translated into  
26 various languages and has gained worldwide popularity in measuring the preference  
27 toward patient-centered communication among physicians, medical students, and  
28 patients <sup>[18-21]</sup>.

1  
2  
3  
4  
5  
6  
7  
8  
9  
10  
11  
12  
13  
14  
15  
16  
17  
18  
19  
20  
21  
22  
23  
24  
25  
26  
27  
28  
29  
30  
31  
32  
33  
34  
35  
36  
37  
38  
39  
40  
41  
42  
43  
44  
45  
46  
47  
48  
49  
50  
51  
52  
53  
54  
55  
56  
57  
58  
59  
60

1 In China, accounts of patient–physician communication have been hotspots in the new  
2 healthcare era, as patient-centeredness is increasingly highlighted in clinical practice.  
3 Ting<sup>[22]</sup> conducted a survey to detect patients’ preferences toward patient-centered  
4 communication in a hospital in the southwest part of China, which was the only  
5 known attempt to apply PPOS in China. Despite the innovativeness, there were  
6 several limitations within this study. For example, as an instrument introduced from  
7 abroad, the psychometric properties, such as reliability and validity, of PPOS in the  
8 Chinese context have not been well tested. Secondly, the preference toward  
9 conducting patient-centered communication among physicians has not yet been  
10 explored. Finally, for a country with vast territory and a population in the billions, a  
11 single survey conducted in a specific medical unit may not be adequately  
12 representative. Thus it is not clear yet how this instrument works in other regions and  
13 surroundings.

14 We conducted this research in Shanghai, which was among the most developed cities  
15 in China and possessed abundant high-quality medical resources, aiming to adapt  
16 PPOS to Chinese (Mandarin) context and assess its psychometric properties  
17 systematically. Furthermore, patients’ as well as physicians’ preferences toward  
18 patient-centered communication were measured using the Chinese-revised PPOS  
19 (CR-PPOS). In addition, factors that might exert influence on physicians’ and patients’  
20 preferences toward patient-centered communication were further explored.

## 21 ***Methods***

### 22 ***Description of the instrument***

23 Currently, PPOS has evolved to a version containing 18 items in two dimensions,  
24 Caring and Sharing<sup>[23]</sup>. The nine-item Caring subscale reflects the degree to which  
25 physicians care about providing warmth and emotional support and regard patient as a  
26 whole person. The nine-item Sharing subscale reflects the degree to which physicians  
27 should share decision making information and power with the patients<sup>[17]</sup>. A higher

1 PPOS total score as well as subscale scores indicates a higher preference toward  
2 patient-centered style in clinical communication. Conversely, a low Caring score  
3 indicates a tendency toward disease-centered style, while a low Sharing score  
4 indicates a tendency toward doctor-centered style.

#### 5 ***Translation and cultural adaption***

6 Obtaining the permission to translate and develop PPOS in the Chinese context by the  
7 original author, scholars with academic backgrounds in medicine, public health,  
8 communication, Chinese and English languages, respectively, were invited to translate  
9 the PPOS to Chinese(Mandarin).Afterward, the bilingual PPOS versions were sent  
10 separately to another five advanced health practitioners for further suggestions and  
11 modifications. The Chinese PPOS(C-PPOS) was then back-translated into English  
12 and sent back to the original author for confirmation.

13 For this C-PPOS, we strove to fit every item to its original version, except for item 17  
14 due to noticeable culture difference. Thus, it was replaced by “A friendly manner is a  
15 major ingredient in the doctor’s treatment of the patients”, according to the results of  
16 a prior study in Nepal<sup>[24]</sup>. Additionally, item 2 was back-translated as “Compared with  
17 centering on individual patients in the past, focusing on the comprehensive quality of  
18 medical services nowadays is more valuable for propelling medical development”,  
19 which differed from the original item “Although health care is less personal these  
20 days, this is a small price to pay for medical advances” in expression but was mostly  
21 consistent in meaning. Finally, 12 physicians and 18 patients were enrolled in  
22 cognitive interviews to further enhance the comprehensibility of the scale in the  
23 Chinese cultural context.

#### 24 ***Pilot study design***

25 A pilot study was conducted in eight clinical settings in Shanghai, including four  
26 community hospitals and four general hospitals. As a minimum sample size of 5 to 10  
27 times the number of scale items for exploratory factor analysis (EFA) and 10 to 20

1 times for confirmative factor analysis<sup>[25]</sup> was required, as well as taking the probable  
2 invalid responses into consideration, we included 400 interviewees. It was assumed  
3 that physicians should comprise at least 20% of the total sample. Physicians and  
4 patients were recruited from the outpatient department of each hospital. Every eligible  
5 participant was requested to complete an anonymous short questionnaire containing  
6 the C-PPOS. Retrieved questionnaires were carefully checked, and those with bad  
7 quality were removed from the dataset, including those with missing item scores or  
8 with the same item score throughout the entire scale.

### 9 *Psychometric properties assessment*

10 In this study, we assessed the psychometric properties via reliability, validity, and  
11 discriminative power tests, based on which the C-PPOS was revised to the CR-PPOS.

12 Internal consistency and test–retest reliability are the most widely tested indicators for  
13 reliability, thus we performed both in this study. In the test–retest survey, 60  
14 participants completed the C-PPOS again after 2 to 4 weeks.

15 Hereby we performed EFA and confirmatory factor analysis (CFA) to assess construct  
16 validity. In addition, content validity was assessed by testing the correlation of the  
17 score of each item and the score of the subscale the item belonged to, as well as the  
18 score of the total scale.

19 Discriminative power reflects the extent to which an item can distinguish different  
20 levels of target variables. We tested discriminative power by comparing the critical  
21 value (CR) of each item.

### 22 *Formal study design*

23 The formal survey was launched 1 month later, in the same settings where the pilot  
24 study was conducted. As a cross-sectional study, the sample size was calculated to be  
25 664 according to the formula provided by Raosoft, Inc.<sup>[26]</sup>, with a total population size  
26 of 24,000,000 (the estimated population of Shanghai) and a confidence level of 99%.

1  
2  
3  
4 1 It was then expanded to 750 to guarantee adequate valid responses. Physician and  
5  
6 2 patient participants were recruited in a similar way as that in the pilot study. After  
7  
8 3 confirming the informed consent, participants were asked to complete a questionnaire  
9  
10 4 containing CR-PPOS, general information (gender, age, education, marriage status,  
11  
12 5 socioeconomic status, self-reported health condition, etc.), and some other  
13  
14 6 well-validated instruments, such as the Patient Confidence in Communication Scale  
15  
16 7 (PCCS)<sup>[27]</sup>, Hospital Anxiety and Depression Scale (HADS), the Rapid Health  
17  
18 8 Literacy Scale<sup>[28]</sup> for patients, and the Maslach Burnout Inventory-General Survey  
19  
20 9 (MBI-GS) and Medical Communication Competence Scale (MCCS)<sup>[29]</sup> for  
21  
22 10 physicians.

### 23 ***Statistical analysis***

24  
25  
26 12 We utilized Epidata 3.1 and Excel 2007 software for dataset establishment. IBM SPSS  
27  
28 13 20.0 and AMOS 21.0 were employed to perform data cleaning and analysis.

29  
30  
31 14 Cronbach's  $\alpha$  coefficient was tested as the indicator of internal consistency and  
32  
33 15 reliability. Normally, a Cronbach's  $\alpha$  of no less than 0.6 is deemed acceptable for an  
34  
35 16 instrument with a relatively small number of items (i.e. no more than 6)<sup>[30]</sup>. Test-retest  
36  
37 17 reliability was assessed as the indicator of interclass correlation coefficient (ICC).  
38  
39 18 Test-retest reliability was considered poor if the ICC value was lower than 0.4 and/or  
40  
41 19 the correlation was not statistically significant ( $P < 0.05$ ).

42  
43 20 For EFA, data were subjected to a principal component analysis with extraction of  
44  
45 21 eigenvalues (greater than 1) for subscales (EFA round 1) and fixed two factors for the  
46  
47 22 total scale (EFA round 2). In EFA round 1, items were removed if a) their factor  
48  
49 23 loadings under either dimension were greater than 0.4, b) their factor loadings under  
50  
51 24 any two dimensions were close (the absolute value difference was less than 0.1), and c)  
52  
53 25 they were the only item under one dimension<sup>[31]</sup>.

54  
55 26 CFA was performed by maximum likelihood analysis to verify the main adjustment  
56  
57 27 indices of the model, including chi-squared/degree of freedom ( $\chi^2/df$ ), root mean



1 square error of approximation (RMSEA), goodness-of-fit index (GFI), adjusted  
2 goodness-of-fit index (AGFI), normed-fit index (NFI), incremental fit index (IFI), and  
3 comparative fit index (CFI). The recommended  $\chi^2/df$  ratio is 1 to 3, and RMSEA  
4 value  $<0.08$  and GFI, AGFI, NNFI, IFI, and CFI  $>0.9$  suggest ideal model fit<sup>[32]</sup>.

5 Respondents with the highest (top 27%) and lowest (bottom 27%) total scale scores  
6 were divided into two groups, after which their CR values of each item were  
7 compared to determine their discriminative power<sup>[33]</sup>. The items without significantly  
8 distinct CRs were eliminated as they lacked competency to distinguish high scores  
9 and low scores.

10 For single factor analysis, we performed the t-test and analysis of variance (ANOVA)  
11 for parameter testing, and the Mann–Whitney U test for non-parameter testing.  
12 Multiple linear regression (MLR) was utilized in processing multifactor analysis.  
13 Statistical significance was set at  $P<0.05$ .

#### 14 ***Ethnical consideration***

15 This study obtained approval from the Institutional Review Board (IRB) of the Fudan  
16 University School of Public Health. Informed consent was provided by all the  
17 participants before the survey.

#### 18 ***Results***

##### 19 ***Pilot study***

##### 20 ***Participants***

21 Three hundred and sixty-two eligible questionnaires were included in the pilot study  
22 from 395 participants, with a valid response rate of 91.65%. The mean age of the  
23 respondents was  $47.41 \pm 18.42$ , and approximately half of them had graduated from  
24 college (Table 1).

#### 25 **Table 1**



## 1 Demographic characteristics of the pilot study sample (n=362)

| Demographic characteristics | Physicians (n=71) | Patient (n=291) |
|-----------------------------|-------------------|-----------------|
| <b>Mean age (range)</b>     | 39.39 (24–64)     | 49.43 (20–96)   |
| <b>Gender, n (%)</b>        |                   |                 |
| Male                        | 33(46.5%)         | 123 (42.3%)     |
| Female                      | 38(53.5%)         | 165 (56.6%)     |
| <b>Education, n (%)</b>     |                   |                 |
| College and above           | 67 (94.4%)        | 112 (38.5%)     |
| Senior school               | 4 (5.6%)          | 83 (28.5%)      |
| Junior school               | 0                 | 72 (24.7%)      |
| Primary school and below    | 0                 | 12 (4.1%)       |
| <b>Setting, n (%)</b>       |                   |                 |
| Community hospital          | 42 (59.2%)        | 130 (44.7%)     |
| General hospital            | 29 (40.8%)        | 161 (55.3%)     |

2

3 ***Confirmatory factor analysis of the C-PPOS***

4 The CFA of the C-PPOS indicated poor model fit (Table 2), which called for further  
5 revision.

6 **Table 2**

7 Goodness-of-fit indices of the CFA of the CR-PPOS and the original C-PPOS

| Model fit indicator | Two factors<br>(18 items) | Two factors<br>(11 items) | Reference value |
|---------------------|---------------------------|---------------------------|-----------------|
| $\chi^2/df$         | 5.04                      | 1.85                      | <3              |
| P-value             | <0.001                    | <0.001                    | >0.05           |
| RMSEA               | 0.11                      | 0.06                      | <0.08           |
| GFI                 | 0.76                      | 0.94                      | >0.90           |

|      |      |      |       |
|------|------|------|-------|
| AGFI | 0.70 | 0.90 | >0.90 |
| NFI  | 0.52 | 0.81 | >0.90 |
| IFI  | 0.58 | 0.90 | >0.90 |
| CFI  | 0.57 | 0.90 | >0.90 |

1

## 2 *Revision of the C-PPOS*

3 The Cronbach's  $\alpha$  of each subscale of C-PPOS was tested as the first step of item  
 4 reduction. The Cronbach's  $\alpha$  of C-PPOS was 0.668, with a Caring subscale score of  
 5 0.493 and a Sharing subscale of 0.575, showing poor internal consistent reliability.  
 6 Hence, items were eliminated in a stepwise manner for each subscale separately until  
 7 elimination of another item would lead to a decrease in the Cronbach's  $\alpha$  of its  
 8 corresponding dimension. Finally, five out of nine items were retained in the Caring  
 9 subscale, and eight out of nine items (except for C-PPOS9) were retained in the  
 10 Sharing subscale.

11 In EFA, the Bartlett's sphericity test reported a Chi-square value of 112.364 ( $p < 0.001$ )  
 12 for the Caring subscale and 146.846 ( $p < 0.001$ ) for the Sharing subscale. The Kaiser–  
 13 Meyer–Olkin (KMO) indices for the two subscales were 0.727 and 0.694, respectively.  
 14 For EFA round 1, all five of the retained items of the Caring subscale were under one  
 15 principal component, which had an eigenvalue greater than 1 (2.197), explaining  
 16 43.949% of the total variance. In the Sharing subscale, C-PPOS4 and C-PPOS10 were  
 17 removed as they met exclusion criteria. Afterward, EFA was performed again on the  
 18 retained six items of the Sharing subscale. This time all six items loaded under one  
 19 principal component (eigenvalue=2.247), which explained 37.448% of the total  
 20 variance. Subsequently, a fixed two-factor EFA was performed to verify the construct  
 21 of the merged 11-item scale. The result indicated that the five items of the Caring  
 22 subscale and the six items of the Sharing subscale were well separated, explaining  
 23 41.67% of the total variance.

1 CFA was performed with the 11-item revised C-PPOS (CR-PPOS, see supplementary  
2 appendix), according to the prior model, indicating a more acceptable and greatly  
3 improved model fit compared with the original scale (Table 2).

#### 4 ***Reliability of the CR-PPOS***

5 The Cronbach's  $\alpha$  of the entire CR-PPOS was 0.735, with 0.709 in the Caring  
6 subscale and 0.644 in the Sharing subscale. Furthermore, the scores of the two  
7 subscales were significantly correlated to the total scale, with Spearman coefficients  
8 of 0.744 (Caring) and 0.840 (Sharing), which were higher than that of these two  
9 subscales (0.312). The ICC was 0.787 for the CR-PPOS, 0.911 for the Caring subscale,  
10 and 0.602 for the Sharing subscale. The ICC for the 11 single items ranged from 0.481  
11 to 0.812. The correlations were all statistically significant ( $p < 0.001$ ), indicating  
12 satisfactory test-retest reliability.

#### 13 ***Validity of the CR-PPOS***

14 The construct validity was well verified through EFA and CFA (see above). As for  
15 content validity, the 11 items' scores and their corresponding subscales' scores were  
16 all significantly correlated ( $p < 0.01$ ), with Spearman coefficients ranging from 0.452  
17 to 0.717.

#### 18 ***Discriminative power of the CR-PPOS***

19 The CR values of the 11 items were all less than 0.01, reaching statistically significant  
20 levels. Thus, the items retained in the CR-PPOS had good discriminative power.

#### 21 ***Formal study***

#### 22 ***Participants***

23 Six hundred and fifty-six eligible questionnaires out of 792 participants were retrieved  
24 in this stage, with a valid response rate of 82.83%. One hundred and sixteen  
25 physicians and 540 patients were included. Respondents' demographic information is

1 partly shown in Tables 3 and 4.

2 **Table 3**

3 Physicians' demographic characteristics (partly) and CR-PPOS scores

| Demographic characteristics | Number (percentage) | Caring subscale | Sharing subscale | CR-PPOS total |
|-----------------------------|---------------------|-----------------|------------------|---------------|
| <b>Gender</b>               |                     |                 |                  |               |
| Male                        | 43 (37.1%)          | 4.75±0.95       | 2.81±0.79        | 3.62±0.62     |
| Female                      | 73 (62.9%)          | 4.68±0.74       | 3.01±0.77        | 3.68±0.57     |
| P value                     |                     | 0.666           | 0.166            | 0.648         |
| <b>Age (Group)</b>          |                     |                 |                  |               |
| –35                         | 50 (43.1%)          | 4.78±0.96       | 2.89±0.71        | 3.69±0.61     |
| –50                         | 52 (44.8%)          | 4.69±0.63       | 2.92±0.85        | 3.63±0.52     |
| 51–                         | 10 (8.7%)           | 4.74±0.36       | 3.33±0.66        | 3.90±0.41     |
| P value                     |                     | 0.827           | 0.247            | 0.363         |
| <b>Education</b>            |                     |                 |                  |               |
| Senior school or below      | 2 (1.7%)            | 4.20±0.00       | 3.00±0.17        | 3.41±0.14     |
| College                     | 71 (61.2%)          | 4.69±0.87       | 3.04±0.76        | 3.69±0.64     |
| Postgraduate                | 42 (36.2%)          | 4.78±0.75       | 2.75±0.80        | 3.61±0.51     |
| P value                     |                     | 0.572           | 0.161            | 0.672         |
| <b>Marriage status</b>      |                     |                 |                  |               |
| Married                     | 89 (76.7%)          | 4.69±0.76       | 2.91±0.77        | 3.64±0.53     |

|   |       |           |            |           |           |           |
|---|-------|-----------|------------|-----------|-----------|-----------|
| 1 | *     | Unmarried | 26 (22.4%) | 4.88±0.82 | 3.08±0.74 | 3.82±0.61 |
| 2 | p<0.0 | P value   |            | 0.270     | 0.318     | 0.149     |
| 3 | 5     |           |            |           |           |           |

5 **Table 4**

6 Patients' demographic characteristics (partly) and CR-PPOS scores

| Demographic characteristics | Number (percentage) | Caring subscale | Sharing subscale | CR-PPOS total |
|-----------------------------|---------------------|-----------------|------------------|---------------|
| <b>Gender</b>               |                     |                 |                  |               |
| Male                        | 195 (36.1%)         | 4.11±0.95       | 3.17±0.74        | 3.49±0.71     |
| Female                      | 330 (61.1%)         | 4.07±0.96       | 3.09±0.77        | 3.44±0.69     |
| P value                     |                     | 0.574           | 0.295            | 0.468         |
| <b>Age (Group)</b>          |                     |                 |                  |               |
| -35                         | 175 (32.4%)         | 4.24±0.91       | 3.32±0.68        | 3.59±0.67     |
| -50                         | 102 (18.9%)         | 4.00±1.00       | 3.02±0.83        | 3.37±0.75     |
| -65                         | 129 (23.9%)         | 3.93±1.02       | 3.00±0.76        | 3.35±0.72     |
| 66-                         | 107 (19.8%)         | 4.14±0.86       | 3.12±0.77        | 3.50±0.64     |
| P value                     |                     | 0.034*          | 0.001*           | 0.009*        |
| <b>Education</b>            |                     |                 |                  |               |
| Primary school or below     | 39 (7.2%)           | 3.93±1.00       | 2.97±0.81        | 3.29±0.78     |
| Junior school               | 112 (20.7%)         | 3.89±0.95       | 2.99±0.77        | 3.29±0.67     |
| Senior school               | 162 (30.0%)         | 4.06±0.95       | 3.12±0.71        | 3.46±0.69     |
| College or above            | 203 (37.6%)         | 4.26±0.93       | 3.23±0.80        | 3.59±0.70     |

P value 0.007\* 0.030\* 0.002\*

### Personal income (CNY)

|         |             |           |           |           |
|---------|-------------|-----------|-----------|-----------|
| <1500   | 23 (4.3%)   | 3.91±0.93 | 2.96±0.83 | 3.27±0.61 |
| –3000   | 105 (19.4%) | 3.83±1.02 | 2.96±0.83 | 3.23±0.77 |
| –5000   | 192 (35.6%) | 4.14±0.95 | 3.16±0.79 | 3.51±0.71 |
| –10000  | 115 (21.3%) | 4.17±0.94 | 3.13±0.68 | 3.54±0.63 |
| 10000–  | 70 (13.0%)  | 4.11±0.97 | 3.26±0.73 | 3.48±0.73 |
| P value |             | 0.048*    | 0.086     | 0.006*    |

### Experience as medical

#### staff

|         |             |           |           |           |
|---------|-------------|-----------|-----------|-----------|
| Yes     | 27 (5.0%)   | 3.67±1.07 | 2.84±0.76 | 3.12±0.80 |
| No      | 241 (44.6%) | 4.05±1.00 | 3.22±0.75 | 3.46±0.75 |
| P value |             | 0.071     | 0.013*    | 0.028*    |

\*p<0.05

### 3 *Comparison of physicians' and patients' CR-PPOS scores*

4 The physicians received an average CR-PPOS score of 3.66±0.59, and the patients'  
5 average score was significantly lower (3.46±0.70). The physicians scored higher in  
6 Caring (4.71±0.82 vs. 4.08±0.95), while the patients scored higher in Sharing  
7 (3.13±0.76 vs. 2.94±0.78). The differences were all statistically significant (p<0.05).

### 8 *Demographic characteristics and CR-PPOS scores*

9 The scores of physicians and patients with distinct demographic characteristics were  
10 compared, as partly listed in Tables 3 and 4. Both patients' age and education level

1 were significantly associated with their scores on the Caring subscale( $p<0.05$ ), the  
2 Sharing subscale( $p<0.001$ ) and the total CR-PPOS( $p<0.01$ ). While patients' income  
3 was only significantly associated with the Caring subscale score( $p<0.05$ ) and the total  
4 CR-PPOS score( $p<0.01$ ). Besides, patients' experience as medical staff was likely to  
5 gain their scores on the Sharing subscale( $p<0.05$ ) and the total CR-PPOS( $p<0.05$ ).  
6 However, no associations of such were traced among physicians.

#### 7 ***Physicians' burnout and CR-PPOS scores***

8 The burnout level of physicians was measured by the MBI-GS. According to the data,  
9 the group of "relatively severe" (scoring 3–5) and the group of "extremely severe"  
10 (scoring 5 or above) were merged as a "severe" group (scoring 3 or above), compared  
11 with the "light" group (scoring 3 or below). Physicians who reported "severe" burnout  
12 scored significantly lower in both the Caring subscale and the total scale than those  
13 reporting "light" burnout.

#### 14 ***Physicians' medical communication competency and CR-PPOS scores***

15 Ninety-nine percent of physicians completed the MCCS, which aimed to assess the  
16 medical communication competency of both physicians and patients. Although  
17 physicians were normally assessed by their patients using MCCS, we transformed this  
18 into a self-reported scale for physicians in this study. The results indicated that,  
19 although the scores of the four dimensions within MCCS were related, no correlation  
20 was found between the MCCS scores and the CR-PPOS scores as well as its  
21 subscales.

#### 22 ***Patients' anxiety and depression and CR-PPOS scores***

23 Five hundred and two patients finished the HADS, an instrument for rapidly screening  
24 anxiety and depressive symptoms among clinic physicians and patients. Patients got a  
25 mean score of 11.57 in the anxiety subscale and 11.77 in the depression subscale.  
26 Three hundred nine patients (57.2%) were determined to be anxiety-positive, and two

1 hundred and seventy seven (51.3%) were determined as depression-positive.  
2 Meanwhile, it should be noticed that HADS can only be used for screening purpose,  
3 thus the positive results cannot be equal to the anxiety/depression with clinical  
4 significance.

5 As anxiety and depressive symptoms were highly comorbid, which was also proven in  
6 our study ( $r_s=0.520$ ), a two-way ANOVA was performed as the first stage to explore  
7 whether an interaction effect existed. It turned out that there was no interaction effect  
8 of anxiety and depression. Anxiety was found to lead to a decrease in patients' scores  
9 on both the Caring subscale( $p<0.05$ ) and the total CR-PPOS( $p<0.05$ ). However,  
10 patients' scores on neither the total scale nor the subscales seemed to be influenced by  
11 their depressive symptoms.

### 12 *Patients' health literacy, PCCS, and CR-PPOS scores*

13 Using the three-item Rapid Health Literacy Scale, no statistical difference was found  
14 in the total CR-PPOS score and the two subscale scores between the poor literacy  
15 group and the adequate literacy group, while patients' health literacy scores showed a  
16 significantly positive correlation with their Sharing subscale scores ( $r_s=0.112$ ).  
17 Similarly, patients' confidence in medical communication measured by PCCS was  
18 inversely correlated with their scores on the Sharing subscale ( $r_s=-0.261$ ). In the  
19 following partial correlation tests, the correlation between PCCS and the Sharing  
20 subscale score remained significant after controlling for the health literacy score,  
21 while no correlation existed between the health literacy score and the Sharing  
22 subscale score after controlling for PCCS.

### 23 *Multivariable analysis*

24 After testing the feasibility, MLR was employed to detect the factors that might exert  
25 influence on physicians' and patients' preferences toward patient-centered  
26 communication. The results showed that the total burnout level might be the  
27 influential factor for physicians in Caring and total CR-PPOS scores, and more factors



1 impacted patients' preference toward patient-centered communication in different  
2 dimensions (Table 5).

3 **Table 5**

4 Variables influencing CR-PPOS scores

| Dimension         | Variables                           | B      | 95% CI           | P      |
|-------------------|-------------------------------------|--------|------------------|--------|
| <b>Physicians</b> |                                     |        |                  |        |
| Caring subscale   | Total burn-out                      | -0.417 | (-0.801, -0.033) | 0.034  |
| Sharing subscale  |                                     |        |                  |        |
| CR-PPOS total     | Total burn-out                      | -0.341 | (-0.611, -0.071) | 0.014  |
| <b>Patients</b>   |                                     |        |                  |        |
| Caring subscale   | Age (Group)                         | -0.292 | (-0.499, -0.086) | 0.006  |
|                   | Education                           | 0.251  | (0.079, 0.423)   | 0.005  |
|                   | Experience as medical staff         | 0.538  | (0.046, 1.029)   | 0.032  |
| Sharing subscale  | Age (Group)                         | -0.202 | (-0.361, -0.043) | 0.013  |
|                   | Education                           | 0.169  | (0.039, 0.299)   | 0.011  |
|                   | Experience as medical staff         | 0.481  | (0.109, 0.852)   | 0.012  |
|                   | Marriage status                     | -0.336 | (-0.666, -0.006) | 0.046  |
|                   | Confidence in medical communication | -0.298 | (-0.451, -0.146) | <0.001 |
| CR-PPOS total     | Age (Group)                         | -0.242 | (-0.396, -0.087) | 0.001  |
|                   | Education                           | 0.222  | (0.093, 0.350)   | 0.001  |
|                   | Experience as medical staff         | 0.476  | (0.111, 0.842)   | 0.011  |

5

6 **Discussion**

1  
2  
3  
4  
5  
6  
7  
8  
9  
10  
11  
12  
13  
14  
15  
16  
17  
18  
19  
20  
21  
22  
23  
24  
25  
26  
27  
28  
29  
30  
31  
32  
33  
34  
35  
36  
37  
38  
39  
40  
41  
42  
43  
44  
45  
46  
47  
48  
49  
50  
51  
52  
53  
54  
55  
56  
57  
58  
59  
60

1 Although the PPOS has been widely used in various languages, only a few studies  
2 have systematically tested its psychometric property while applying it<sup>[34-36]</sup>, and no  
3 related results have been reported in China yet. This study showed that neither the  
4 ICC of the overall 18-item C-PPOS nor its two subscales were above 0.7, which was  
5 comparable to the existing research but still not good enough. Deletion of items 9 and  
6 17 improved the Cronbach's  $\alpha$ , which is consistent with a study conducted in Sri  
7 Lanka<sup>[37]</sup>. After modifying, the two subscales of the 11-item PPOS were well  
8 separated in a fixed-factor EFA, with better indexes than prior similar studies, and the  
9 overall scale validity was reconfirmed by CFA. Taking into account the test-retest  
10 reliability and discriminative power, the 11-item CR-PPOS obtained better  
11 psychometric property than the original 18-item scale; thus it is considered to have  
12 greater applicability in the Chinese population.

13 Using the 11-item CR-PPOS, physicians and patients indicated similar trends in the  
14 achieved scores. In the overall scale, they both obtained medium scores (around the  
15 median value of 3.5), and they both had relatively high Caring scores (over 4.0) and  
16 low Sharing scores (around 3.0 or below). This indicated that, although physicians  
17 and patients generally showed a medium level of patient-centeredness in clinical  
18 communication, they expressed higher preferences toward caring from a  
19 biopsychosocial perspective than shared information and involvement in decision  
20 making. Although the physicians' data is still absent in China, the 95% confidence  
21 interval of mean score of patients in this study slightly overlapped that of the prior  
22 study<sup>[22]</sup>, which implied that Chinese patients might express similar preferences  
23 toward patient-centered communication, regardless of the regions they were living in.  
24 The differences between the scores of physicians and patients, however, may still  
25 prompt the gap in Chinese physicians and patients regarding their understanding and  
26 expectations in clinical communication. Comparing the data of this study with that  
27 from abroad, the majority showed a similar pattern that physicians were more  
28 patient-centered in Caring than in Sharing, but there were still two exceptions for the  
29 surveys conducted in Portugal and Australia, indicating opposite results<sup>[38,39]</sup>, which

1 may be due to the difference in physician training modes and local health systems.  
2 Thus, further research is needed to determine the reasons for such a distinction.

3 Preference toward patient-centered communication, as measured by the PPOS, is  
4 influenced by both personal characteristics and social environmental factors. This  
5 study made the first attempt to detect the potential influential factors of  
6 patient-centered communication among Chinese physicians. The results showed no  
7 association between PPOS scores and a series of factors, including gender, age,  
8 education level, career length, and type of setting. These results were consistent with  
9 several prior studies in other countries, except gender differences, for female  
10 physicians scored significantly higher than male colleagues in some studies <sup>[40,41]</sup>.  
11 Apart from these factors, which were frequently mentioned in the existing research,  
12 we found that burnout level might exert impact on physicians' PPOS total score as  
13 well as their Caring subscale score, indicating that physicians with a higher total  
14 burnout level were generally less likely to be patient-centered in clinical  
15 communication. Although we assumed that poor communication ability may relate to  
16 a lower preference for patient-centeredness in communication, no link was found  
17 between physicians' medical communication competency measured by MCCS and  
18 their PPOS scores in this study.

19 As Ting<sup>[22]</sup> reported, age and education mainly influenced Chinese patients' overall  
20 preference on patient-centered communication. In this study, younger and/or  
21 better-educated patients also expressed a higher preference for patient-centered  
22 communication in both the Caring and Sharing dimensions. Although some studies  
23 have reported a gender difference<sup>[34,37,42,43]</sup>, it seems that in case of Chinese patients,  
24 age and education level, rather than gender, contribute to the different preferences  
25 toward patient-centered communication. Meanwhile, the type of setting and social  
26 economic status are not considered as influential factors, which is controversial<sup>[44]</sup>. It  
27 was found that experience as medical staff decreased the extent to which patients  
28 wanted a patient-centered communication style. One plausible explanation is that  
29 those who had worked as medical staff had obtained a more comprehensive

1 understanding of how things were inside the hospital than those who had not. Thus,  
2 they subconsciously lowered their expectation of a patient-centered manner in  
3 communication, which might raise demand for physicians, due to their sympathy  
4 toward the doctor groups for their daily heavy workload. Additionally, although  
5 anxiety was detected as an influential factor in single factor analysis, the final  
6 regression model showed patients' PPOS scores were irrelevant to their anxiety and  
7 depression status. There is also a need to further probe the role of patient  
8 communication confidence, as well as its seeming mediation effect on the relationship  
9 between patients' health literacy and preference for shared information and decision  
10 making.

11 Though we are far away from disentangling the patient-centered conundrum<sup>[6]</sup>,  
12 considering the deteriorating physician-patient relationship in current Chinese society,  
13 this study still has significant practice implications. As a valid instrument, the  
14 CR-PPOS can be applied to better measure both physicians' and patients' preference  
15 toward patient-centered communication in China. On one hand, the divergence in  
16 communication preference between physicians and patients can be discovered. On the  
17 other hand, it will be possible and reasonable to link certain personal characteristics  
18 with individuals' preference toward clinical communication, and in China it is  
19 particularly true for patients according to this study. Based on these findings, specific  
20 training can be developed and offered to physicians, guiding them how to recognize  
21 patients with different communication preferences and adopt corresponding  
22 communication strategies afterwards. In this way not only patients' expectations are  
23 better fulfilled, but also the communication efficiency is enhanced, both contributing  
24 to reduced complaints in clinical communication, and improved physician-patient  
25 relationship<sup>[45]</sup>.

## 26 **Conclusion**

27 The CR-PPOS was developed as an applicable instrument to measure the preference  
28 toward patient-centered communication of physicians and patients in Chinese context.

1  
2  
3  
4  
5  
6  
7  
8  
9  
10  
11  
12  
13  
14  
15  
16  
17  
18  
19  
20  
21  
22  
23  
24  
25  
26  
27  
28  
29  
30  
31  
32  
33  
34  
35  
36  
37  
38  
39  
40  
41  
42  
43  
44  
45  
46  
47  
48  
49  
50  
51  
52  
53  
54  
55  
56  
57  
58  
59  
60

1 Physicians and patients were generally more patient-centered in medical  
2 communication regarding overall biopsychosocial care than shared information and  
3 decision making, but there were still significant gaps between physicians and patients  
4 on the extent to which they prefer this type of communication. Relieving of burnout  
5 could help physicians to be more patient-centered in communication. Patients with  
6 young age, high education level, and medical staff experience tended to have higher  
7 preference toward patient-centered communication.

8 **Competing interests:** All authors have completed the ICMJE uniform disclosure  
9 form at [www.icmje.org/coi\\_disclosure.pdf](http://www.icmje.org/coi_disclosure.pdf) and declare: Jie Wang had financial  
10 support from the China Postdoctoral Science Foundation for the submitted work, Fan  
11 Wang has received funds from Shanghai Health and Family Planning Commission; no  
12 financial relationships with any organizations that might have an interest in the  
13 submitted work in the previous three years; no other relationships or activities that  
14 could appear to have influenced the submitted work."

15  
16 **Ethics committee approval information:** The study was approved by Fudan  
17 University School of Public Health Institutional Review Board (No.  
18 IRB#2015-12-0575).

19  
20 **Contributors:** Jie Wang granted research funding, engaged in study design and data  
21 analysis, and was the main drafter of the Introduction and Discussion sections; Runyu  
22 Zou led study design, data collection, data analysis, and drafted the Method, and  
23 Results sections of the manuscript; Hua Fu and Fan Wang were the co-principal  
24 investigators of this project, granting research funding and mentoring study design,  
25 data collection, and article revision. They also issued final approval for submission;  
26 Haihong Qian and Yueren Yan contributed to data collection and refining the article.  
27 All authors have approved the final version of this manuscript.

28 **Acknowledgments:** We appreciate Professor Edward Krupat from Harvard  
29 University for his generous authorization to use and revise PPOS for the Chinese

1 context. We are also grateful to the coordinators of the collaborating hospitals for their  
2 kind assistance.

3 **Funding:** This work was supported by the first-class General Financial Grant from  
4 the China Postdoctoral Science Foundation [grant number 2015M580283] and  
5 Construction of the key disciplines of the fourth round public health three-year action  
6 plan of Shanghai Health and Family Planning Commission [grant number  
7 15GWZK1001].

8 **Data Sharing Statement:** Extra data from this study could be accessed by contacting  
9 the corresponding author Fan Wang via wangfan512@126.com.

10 Detail has been removed from this case description/these case descriptions to ensure  
11 anonymity. The editors and reviewers have seen the detailed information available  
12 and are satisfied that the information backs up the case the authors are making.

### 13 **Reference**

- 14 1 Balint E, Ball D, Hare M. Training medical students in patient-centered medicine,  
15 *Compr Psychiatry*1969;10:249-58.
- 16 2 Hirono I, Hideki H, Takahiro K. The evolving concept of “patient-centeredness” in  
17 patient-physician communication research, *Soc Sci Med*2013;96:147-53.
- 18 3 Institute of Medicine. Crossing the quality chasm: a new health system for the 21st  
19 century. Washington (DC):National Academies Press 2001:39-40.
- 20 4 Mohammed A, Mannan F, Chaudhry Z, et al. Quality of care in university hospitals  
21 in Saudi Arabia: a systematic review. *BMJ Open*2016;6(2):e008988.
- 22 5 Catro EM, van Regenmortel T, Vanhaecht K, et al. Patient empowerment, patient  
23 participation and patient-centeredness in hospital care: A concept analysis based on a  
24 literature review. *Patient Educ Couns*2016;99:1923-39.
- 25 6 Skelton J. Language and Clinical Communication: this bright Babylon. Oxford:  
26 Radcliffe Publishing 2008:93-98.
- 27

- 1  
2  
3  
4  
5  
6  
7  
8  
9  
10  
11  
12  
13  
14  
15  
16  
17  
18  
19  
20  
21  
22  
23  
24  
25  
26  
27  
28  
29  
30  
31  
32  
33  
34  
35  
36  
37  
38  
39  
40  
41  
42  
43  
44  
45  
46  
47  
48  
49  
50  
51  
52  
53  
54  
55  
56  
57  
58  
59  
60
- 1 7 Stewart M, Brown JB, Weston WW, et al. Patient-centered medicine: transforming  
2 the clinical method, 2nd edn. United Kingdom: Radcliffe Medical Press 2003:5-16.
- 3 8 Hudon C, Fortin M, Haggerty JL, et al. Measuring patients' perceptions of  
4 patient-centered care: a systematic review of tools for family medicine. *Ann Fam*  
5 *Med*2011;9:155-64.
- 6 9 Epstein RM, Franks P, Fiscella K, et al. Measuring patient-centered communication  
7 in patient-physician consultations: theoretical and practical issues. *Soc Sci*  
8 *Med*2005;61:1516-28.
- 9 10 Bensing JM, Verhaak PF, van Dulmen AM, et al. Communication: the royal  
10 pathway to patient-centered medicine. *Patient Educ Couns*2000;39:1-3.
- 11 11 Mead N, Bower P. Patient-centeredness: a conceptual framework and review of the  
12 empirical literature. *Soc Sci Med*2000;51:1087-10.
- 13 12 Taylor K. Paternalism, participation and partnership-the evolution of  
14 patient-centeredness in the consultation. *Patient Educ Couns*2009;74:150-55.
- 15 13 Greenfield S, S. Kaplan, J. Ware, E.M. Yano, H. Frank, Patients' participation in  
16 medical care. *J Gen Intern Med*1988;88:448-57.
- 17 14 Marinker M. From compliance to concordance: achieving shared goals in medicine  
18 taking. *Brit Med J*1997;314:747-8.
- 19 15 Schiavo R. Health Communication: From Theory to Practice, 2<sup>nd</sup> edn. San  
20 Francisco: Jossay-Bass 2013:195-96.
- 21 16 Morris MA, Clayman ML, Peters KJ, et al. Patient-centered communication  
22 strategies for patients with aphasia: discrepancies between what patients want and  
23 what physicians do. *Disabil Health J*2015;8:208-15.
- 24 17 Krupat E, Hiam CM, Fleming MZ, et al. Patient-centeredness and its correlates  
25 among first year medical students. *Int J Psychiatry Med*1999;29:347-56.
- 26 18 Kim J. Differences in attitude toward patient-centeredness in patients and  
27 physicians. *Korean J Med Educ*2013;25:149-56.
- 28 19 Ishikawa I, Eto M, Kitamura K, et al. Resident physicians' attitudes and  
29 confidence in communicating with patients: A pilot study at a Japanese University  
30 hospital. *Patient Educ Couns*2014;96:361-66.



- 1  
2  
3 1 20 Tsimtsiou Z, Kirana PS, Hatzichristou D. Determinants of patients' attitudes  
4 toward patient-centered care: A cross-sectional study in Greece. *Patient Educ*  
5 *Couns*2014;97:391-95.  
6  
7  
8 21 Dockens AL, Bellon-Harn ML, Manchaiah V. Preference to patient-centeredness in  
9 pre-service speech and hearing sciences students: a cross-sectional study. *J Audiol*  
10 *Otol*2016;20:73-9.  
11  
12 22 Xu T, Bao Y, Liang Y, et al. Patient perception and the barriers to practicing  
13 patient-centered communication: A survey and in-depth interview of Chinese patients  
14 and physicians. *Patient Educ Couns*2016;99:364-69.  
15  
16 23 Krupat E, Rosenkranz SL, Yeager CM, et al. The practice orientations of  
17 physicians and patients: the effect of doctor-patient congruence on satisfaction.  
18 *Patient Educ Couns*2000;39:49-59.  
19  
20 24 Moore M. What does patient-centered communication mean in Nepal? *Med*  
21 *Educ*2008;42:18-26.  
22  
23 25 Hair Jr JF, Black WC, Babin BJ, et al. *Multivariate Data Analysis*, 7th edn. Beijing:  
24 China Machine Press 2011:100-123.  
25  
26 26 Raosoft Inc. Sample size calculation [online]. [www.raosoft.com/samplesize.html](http://www.raosoft.com/samplesize.html).  
27  
28 27 Tran A, Haidet P, Street R, et al. Empowering communication: a community-based  
29 intervention for patients. *Patient Educ Couns*2004;52:113-21.  
30  
31 28 Chew LD, Bradley KA, Boyko EJ. Brief questions to identify patients with  
32 inadequate health literacy. *Fam Med*2004;36:588-94.  
33  
34 29 Cegala DJ, Coleman MT, Warisse J. The development and partial test of the  
35 Medical Communication Competence Scale (MCCS). *J Health*  
36 *Commun*1998;10:261-88.  
37  
38 30 Ponterotto JG, Ruckdeschel DE. An overview of coefficient alpha and a reliability  
39 matrix for estimating adequacy of internal consistency coefficients with psychological  
40 research measures. *Percept Mot Skills*2007;105:997-1014.  
41  
42 31 Osborne JW, Costello AB. Best practices in exploratory factor analysis: four  
43 recommendations for getting the most from your analysis. *Pract Assess Res Eval*  
44 2005;10:1-9.  
45  
46  
47  
48  
49  
50  
51  
52  
53  
54  
55  
56  
57  
58  
59  
60



- 1  
2  
3 32 Brown TA. Confirmatory factor analysis for applied research, 2<sup>nd</sup> edn. New York:  
4 The Guilford Press 2015:67-73.  
5  
6  
7 33 Backhoff E, Larrazolo N, Rosas M. The level of difficulty and discrimination  
8 power of Basic Knowledge and Skill Examination (EXHCOBA). *Revista Electrónica*  
9 de Investigación Educativa 2000;2(1). Retrieved on December 20, 2016 from:  
10  
11  
12 http://redie.uabc.mx/vol2no1/contents-backhoff.html  
13  
14 34 Krupat E, Yeager CM, Putnam S. Patient role orientations, doctor-patient fit, and  
15 visit satisfaction. *Psychol Health*2000;15:707-19.  
16  
17  
18 35 Pereira CM, Amaral CF, Ribeiro MM, et al. Cross-cultural validation of the  
19 Patient-Practitioner Orientation Scale. *Patient Educ Couns*2013;91:37-43.  
20  
21  
22 36 Kiessling C, Fabry G, Rudolf Fisher M, et al. German translation and construct  
23 validation of the Patient-Provider Orientation Scale(PPOS-D12). *Psychother*  
24 *Psychsom Med Psychol*2014;64:122-27.  
25  
26  
27 37 Mudiyanse RM, Pallegame RW, Jayalath T, et al. Translation and validation of the  
28 Patient-Practitioner Orientation Scale in Sri Lanka. *Educ Health(Ablingdon)*  
29 2015;28:35-40.  
30  
31  
32 38 Laplante-Levesque A, Hickson L, Grenness C. An Australian survey of  
33 audiologists' preferences for patient-centeredness. *Int J Audiol*2014;53:S76-82.  
34  
35  
36 39 Manchiah V, Gomersall PA, Tome D, et al. Audiologists' preferences for  
37 patient-centeredness: a cross sectional questionnaire study of cross-cultural  
38 differences and similarities among professionals in Portugal, India and Iran. *BMJ*  
39 *Open*2014;4:e005915.  
40  
41  
42 40 Abiola T, Udofia O, Abdullahi AT. Patient-doctor relationship: the practice  
43 orientations of doctors in Kano. *Niger J Clin Pract*2014;17:241-47.  
44  
45  
46 41 Mann KJ, Hoffman A, Miller D, et al. The effect of a patient- and family-centered  
47 care curriculum on pediatric residents' patient-centeredness. *J Grad Med*  
48 *Educ*2013;5:36-40.  
49  
50  
51 42 Krupat E, Hsu J, Irish J, et al. Matching patients and practitioners based on beliefs  
52 about care: Results of a randomized controlled trial. *Am J Manag Care*  
53 2004;10:814-22.  
54  
55  
56  
57  
58  
59  
60

- 1  
2  
3 43 Lau SR, Christensen ST, Andreason JT. Patients' preferences for patient-centered  
4 communication: a survey from an outpatient department in rural Sierra Leone. *Patient*  
5 *Educ Couns*2013;93:312-18.  
6  
7  
8  
9 44 Little P, Everitt H, Williamson I, et al. Preferences of patients for patient-centered  
10 approach to consultation in primary care: observational study. *BMJ*2001;322:468-72.  
11  
12 45 Liu X, Rohrer W, Luo A, et al. Doctor-patient communication skills training in  
13 mainland China: A systematic review of the literature. *Patient Educ*  
14 *Couns*2015;98:3-14.  
15  
16  
17  
18  
19  
20  
21  
22  
23  
24  
25  
26  
27  
28  
29  
30  
31  
32  
33  
34  
35  
36  
37  
38  
39  
40  
41  
42  
43  
44  
45  
46  
47  
48  
49  
50  
51  
52  
53  
54  
55  
56  
57  
58  
59  
60

**Appendix****The CR-PPOS (English version)**

---

**Caring subscale**

During clinical process, doctors will be suspected of prying the privacy of patients when they ask patients a lot about personal backgrounds.

If a doctor's diagnosis and treatment levels are high enough, the way of his/her communication with patients is not so important.

If a doctor spends too much honesty and enthusiasm in the doctor-patient communication, he/she wouldn't have made great achievements.

Most patients in clinics want to leave the doctors' office as soon as possible(so as to reduce the time communicating with doctors)

For doctors, knowing the patient's culture and backgrounds is not very important for treating illness.

**Sharing subscale**

During clinical process, doctors should be the ones who dominate the conversation.

Patients should rely on doctor's professional skills during clinical process and should not try to find out the answers to their medical conditions by themselves.

Many patients keep asking questions to doctors, although they are not necessarily getting more new information.

During the clinical process, if a patient does not agree with the opinions of a doctor, then it means that the doctor doesn't get the patient's respect and trust.

During clinical process, patients should always be aware that doctors are dominant.

It is usually not very helpful if patients search for medical information on their own-instead, they could be even more confused.

---

STROBE 2007 (v4) Statement—Checklist of items that should be included in reports of *cross-sectional studies*

| Section/Topic                | Item # | Recommendation                                                                                                                                                                       | Reported on page # |
|------------------------------|--------|--------------------------------------------------------------------------------------------------------------------------------------------------------------------------------------|--------------------|
| Title and abstract           | 1      | (a) Indicate the study’s design with a commonly used term in the title or the abstract                                                                                               | 1                  |
|                              |        | (b) Provide in the abstract an informative and balanced summary of what was done and what was found                                                                                  | 2                  |
| <b>Introduction</b>          |        |                                                                                                                                                                                      |                    |
| Background/rationale         | 2      | Explain the scientific background and rationale for the investigation being reported                                                                                                 | 3-5                |
| Objectives                   | 3      | State specific objectives, including any prespecified hypotheses                                                                                                                     | 5                  |
| <b>Methods</b>               |        |                                                                                                                                                                                      |                    |
| Study design                 | 4      | Present key elements of study design early in the paper                                                                                                                              | 5-8                |
| Setting                      | 5      | Describe the setting, locations, and relevant dates, including periods of recruitment, exposure, follow-up, and data collection                                                      | 6,7                |
| Participants                 | 6      | (a) Give the eligibility criteria, and the sources and methods of selection of participants                                                                                          | 6-8                |
| Variables                    | 7      | Clearly define all outcomes, exposures, predictors, potential confounders, and effect modifiers. Give diagnostic criteria, if applicable                                             | 7,8                |
| Data sources/<br>measurement | 8*     | For each variable of interest, give sources of data and details of methods of assessment (measurement). Describe comparability of assessment methods if there is more than one group | 7,8                |
| Bias                         | 9      | Describe any efforts to address potential sources of bias                                                                                                                            | 7                  |
| Study size                   | 10     | Explain how the study size was arrived at                                                                                                                                            | 6,7                |
| Quantitative variables       | 11     | Explain how quantitative variables were handled in the analyses. If applicable, describe which groupings were chosen and why                                                         | 7                  |
| Statistical methods          | 12     | (a) Describe all statistical methods, including those used to control for confounding                                                                                                | 8,9                |
|                              |        | (b) Describe any methods used to examine subgroups and interactions                                                                                                                  |                    |
|                              |        | (c) Explain how missing data were addressed                                                                                                                                          | 7                  |
|                              |        | (d) If applicable, describe analytical methods taking account of sampling strategy                                                                                                   |                    |
|                              |        | (e) Describe any sensitivity analyses                                                                                                                                                |                    |
| <b>Results</b>               |        |                                                                                                                                                                                      |                    |

|                          |     |                                                                                                                                                                                                              |            |
|--------------------------|-----|--------------------------------------------------------------------------------------------------------------------------------------------------------------------------------------------------------------|------------|
| Participants             | 13* | (a) Report numbers of individuals at each stage of study—eg numbers potentially eligible, examined for eligibility, confirmed eligible, included in the study, completing follow-up, and analysed            | 9,12       |
|                          |     | (b) Give reasons for non-participation at each stage                                                                                                                                                         | 9,12       |
|                          |     | (c) Consider use of a flow diagram                                                                                                                                                                           |            |
| Descriptive data         | 14* | (a) Give characteristics of study participants (eg demographic, clinical, social) and information on exposures and potential confounders                                                                     | 9,10,12-17 |
|                          |     | (b) Indicate number of participants with missing data for each variable of interest                                                                                                                          | 13,14,16   |
| Outcome data             | 15* | Report numbers of outcome events or summary measures                                                                                                                                                         | 15         |
| Main results             | 16  | (a) Give unadjusted estimates and, if applicable, confounder-adjusted estimates and their precision (eg, 95% confidence interval). Make clear which confounders were adjusted for and why they were included | 18         |
|                          |     | (b) Report category boundaries when continuous variables were categorized                                                                                                                                    |            |
|                          |     | (c) If relevant, consider translating estimates of relative risk into absolute risk for a meaningful time period                                                                                             |            |
| Other analyses           | 17  | Report other analyses done—eg analyses of subgroups and interactions, and sensitivity analyses                                                                                                               |            |
| <b>Discussion</b>        |     |                                                                                                                                                                                                              |            |
| Key results              | 18  | Summarise key results with reference to study objectives                                                                                                                                                     | 19         |
| Limitations              | 19  | Discuss limitations of the study, taking into account sources of potential bias or imprecision. Discuss both direction and magnitude of any potential bias                                                   | 3          |
| Interpretation           | 20  | Give a cautious overall interpretation of results considering objectives, limitations, multiplicity of analyses, results from similar studies, and other relevant evidence                                   | 18-21      |
| Generalisability         | 21  | Discuss the generalisability (external validity) of the study results                                                                                                                                        | 21         |
| <b>Other information</b> |     |                                                                                                                                                                                                              |            |
| Funding                  | 22  | Give the source of funding and the role of the funders for the present study and, if applicable, for the original study on which the present article is based                                                | 23         |

\*Give information separately for cases and controls in case-control studies and, if applicable, for exposed and unexposed groups in cohort and cross-sectional studies.

**Note:** An Explanation and Elaboration article discusses each checklist item and gives methodological background and published examples of transparent reporting. The STROBE checklist is best used in conjunction with this article (freely available on the Web sites of PLoS Medicine at <http://www.plosmedicine.org/>, Annals of Internal Medicine at <http://www.annals.org/>, and Epidemiology at <http://www.epidem.com/>). Information on the STROBE Initiative is available at [www.strobe-statement.org](http://www.strobe-statement.org).

# BMJ Open

## Measuring the preference toward patient-centered communication with the Chinese-revised Patient-Practitioner Orientation Scale: A cross-sectional study among physicians and patients in clinical settings in Shanghai, China

|                                 |                                                                                                                                                                                                                                                                                                                                                                                                                                                                                                                                                                                                                                                                                           |
|---------------------------------|-------------------------------------------------------------------------------------------------------------------------------------------------------------------------------------------------------------------------------------------------------------------------------------------------------------------------------------------------------------------------------------------------------------------------------------------------------------------------------------------------------------------------------------------------------------------------------------------------------------------------------------------------------------------------------------------|
| Journal:                        | <i>BMJ Open</i>                                                                                                                                                                                                                                                                                                                                                                                                                                                                                                                                                                                                                                                                           |
| Manuscript ID                   | bmjopen-2017-016902.R2                                                                                                                                                                                                                                                                                                                                                                                                                                                                                                                                                                                                                                                                    |
| Article Type:                   | Research                                                                                                                                                                                                                                                                                                                                                                                                                                                                                                                                                                                                                                                                                  |
| Date Submitted by the Author:   | 30-Jun-2017                                                                                                                                                                                                                                                                                                                                                                                                                                                                                                                                                                                                                                                                               |
| Complete List of Authors:       | Wang, Jie; Key Laboratory of Public Health Safety, Ministry of Education, School of Public Health, Fudan University<br>Zou, Runyu; Erasmus University Medical Center, Department of Epidemiology, Department of Child and Adolescent Psychiatry<br>Fu, Hua; Key Laboratory of Public Health Safety, Ministry of Education, School of Public Health, Fudan University<br>Qian, Haihong; School of Basic Medicine Science, Fudan University<br>Yan, Yueren; Key Laboratory of Public Health Safety, Ministry of Education, School of Public Health, Fudan University<br>Wang, Fan; Key Laboratory of Public Health Safety, Ministry of Education, School of Public Health, Fudan University |
| <b>Primary Subject Heading</b>: | Communication                                                                                                                                                                                                                                                                                                                                                                                                                                                                                                                                                                                                                                                                             |
| Secondary Subject Heading:      | Patient-centred medicine, Health services research                                                                                                                                                                                                                                                                                                                                                                                                                                                                                                                                                                                                                                        |
| Keywords:                       | Patient-centered communication, Clinical setting, Chinese, Scale                                                                                                                                                                                                                                                                                                                                                                                                                                                                                                                                                                                                                          |
|                                 |                                                                                                                                                                                                                                                                                                                                                                                                                                                                                                                                                                                                                                                                                           |

SCHOLARONE™  
Manuscripts

1  
2  
3  
4 **1 Measuring the preference toward patient-centered communication**  
5  
6 **2 with the Chinese-revised Patient-Practitioner Orientation Scale: A**  
7  
8 **3 cross-sectional study among physicians and patients in clinical**  
9  
10 **4 settings in Shanghai, China**

11  
12  
13 Jie Wang<sup>a</sup>, <sup>1</sup>Runyu Zou<sup>b</sup>, Hua Fu<sup>a</sup>, Haihong Qian<sup>c</sup>, Yueren Yan<sup>a</sup>, Fan Wang<sup>a\*</sup>  
14  
15

16  
17 <sup>a</sup> *Key Laboratory of Public Health Safety, Ministry of Education, School of Public*  
18 *Health, Fudan University, Shanghai, China.*

19 <sup>b</sup> *Department of Epidemiology, Department of Child and Adolescent Psychiatry,*  
20 *Erasmus University Medical Center, Rotterdam, the Netherlands.*

21 <sup>c</sup> *School of Basic Medicine Science, Fudan University, Shanghai, China.*  
22  
23

24  
25  
26  
27  
28  
29  
30  
31  
32  
33  
34  
35  
36  
37  
38  
39  
40  
41  
42  
43  
44  
45  
46  
47  
48  
49  
50  
51  
52  
53  
54  
55  
56  
57  
58  
59  
60

13 Words count: 4086 (excluding title, abstract, article summary, competing interests,  
14 contributors, acknowledgments, funding, tables, appendix, and references)

---

<sup>1</sup> Runyu Zou as joint first author

\* Corresponding author at: P.O. Box 248, 138 Yixueyuan Road, 200032, Shanghai, China.  
E-mail address: wangfan512@126.com Tel:86-21-54237509 (F. Wang)

1  
2  
3 **Abstract**  
4

5 *Objectives:* To adapt the Patient-Practitioner Orientation Scale (PPOS) a Chinese  
6  
7 context and explore the preference toward patient-centered communication among  
8  
9 physicians and patients with the Chinese-revised Patient-Practitioner Orientation  
10  
11 Scale (CR-PPOS).  
12

13  
14  
15 *Design:* A cross-sectional questionnaire-based study.  
16  
17

18  
19 *Setting:* Clinical settings from eight medical units, including four community  
20  
21 hospitals and four general hospitals, in Shanghai, China.  
22

23  
24 *Participants:* 1018 participants, including 187 physicians and 831 patients, completed  
25  
26 this study in two successive stages.  
27

28  
29  
30 *Outcome measurements:* Psychometric properties of the CR-PPOS, and participants'  
31  
32 score on the CR-PPOS.  
33

34  
35  
36 *Results:* Compared with the original PPOS, the 11-item CR-PPOS obtained better  
37  
38 psychometric indices. Physicians and patients scored differently on both the total  
39  
40 CR-PPOS and its two subscales. Compared with physicians, the scores of patients  
41  
42 were more influenced by their personal characteristics, such as age and education.  
43

44  
45  
46 *Conclusions:* The CR-PPOS is a better instrument in a Chinese context than the  
47  
48 original translated version. The divergence in the extent to which patient-centered  
49  
50 communication is preferred among Chinese physicians and patients should be noted.  
51  
52 Adapting physicians' communication strategy to patients' preferences based on their  
53  
54 personal characteristics can be a viable approach toward improving clinical efficiency.  
55

56 **Keywords:** Patient-centered communication, Clinical setting, Chinese, Scale  
57  
58  
59  
60



1  
2  
3  
4  
5  
6  
7  
8  
9  
10  
11  
12  
13  
14  
15  
16  
17  
18  
19  
20  
21  
22  
23  
24  
25  
26  
27  
28  
29  
30  
31  
32  
33  
34  
35  
36  
37  
38  
39  
40  
41  
42  
43  
44  
45  
46  
47  
48  
49  
50  
51  
52  
53  
54  
55  
56  
57  
58  
59  
60

1 *Article summary: Strengths and limitations of this study*

- 2 • It is the first study to systematically assess the psychometric properties of the  
3 PPOS in a Chinese context.
- 4 • Preference toward patient-centered communication among Chinese physicians  
5 and patients was simultaneously measured using the CR- PPOS, which made it  
6 possible to make comparisons between the two groups.
- 7 • The association between broader factors and participants' preference toward  
8 patient-centered communication was explored.
- 9 • For the sake of convenience, the participants in this study were sampled only  
10 from eight clinical units in Shanghai, which might lead to limited external  
11 validity.
- 12 • Caution should be used when directly comparing scores measured by the  
13 CR-PPOS and the PPOS, as the number of items they contain are not  
14 consistent.

15  
16 **Introduction**

17 In 1969, Balint<sup>[1]</sup> was greatly influential in the development of patient-centeredness,  
18 which has been one of the most frequently discussed principles in medical practice  
19 over the past few decades<sup>[2]</sup>. It has also been regarded as one of the six core  
20 components of high-quality medical care<sup>[3]</sup>. Enhancing patient-centeredness is seen as  
21 vital in improving the quality of health care delivery<sup>[4]</sup>.

22 Patient-centeredness, however, has not been uniformly defined<sup>[5]</sup>. It is not clear  
23 whether patient-centeredness should be considered as a set of gestures (a combination  
24 of setting, language, paralanguage, etc.), or a state of mind. Furthermore, it is  
25 uncertain whether patient-centeredness exists as a yearning inside the mind of the  
26 physician or the patient, whether it consists of a series of behaviors, or a mindset, or a

1 compendium of things to say<sup>[6]</sup>.

2 Despite these conundrums, various conceptual models have been created to  
3 demonstrate patient-centeredness for the positive effects it brings to medical care<sup>[7,8]</sup>.

4 Epstein<sup>[9]</sup> has indicated that patient-centeredness could be fulfilled at three levels:  
5 interpersonal behavior, technical intervention, and health system innovation. As a key  
6 element in interpersonal behavior between physicians and patients, patient-centered  
7 communication has been a highly recommended model, enabling practitioners to offer  
8 care that is concordant with the patient's values, needs, and preferences, and that  
9 allows patients to become actively involved in decision that affect their health<sup>[10,11]</sup>.

10 Patient-centered communication contributes to building a partnership between  
11 physicians and patients, instead of the traditional paternalism<sup>[12]</sup>. Patient-centered  
12 communication has also been reported to improve a variety of clinical outcomes in  
13 diverse settings, and to enhance patients' adherence to prescription medication  
14 directions and other types of treatment<sup>[13,14]</sup>.

15 However, considering the cultural and contextual differences that exist in the practice  
16 of medicine, patient-centered communication may not be universally applicable  
17 despite the benefits it offers<sup>[15]</sup>. Thus it is suggested that physicians learn patients'  
18 communication preference and then incorporate them into their own communication  
19 style<sup>[16]</sup>. However, available instruments for measuring the preferences in  
20 patient-centered communication remain sparse. Originally developed by Krupat<sup>[17]</sup>,  
21 the Patient-Practitioner Orientation Scale (PPOS), which embraces the four element  
22 model of patient-centeredness, has been translated into various languages and gained  
23 worldwide popularity in measuring the preferences toward patient-centered  
24 communication among physicians, medical students, and patients<sup>[18-21]</sup>.

25 In China, accounts of patient-physician communication have been prominent in the  
26 new healthcare era, as patient-centeredness is increasingly highlighted in clinical  
27 practice. Ting<sup>[22]</sup> conducted a survey to identify patients' preferences toward  
28 patient-centered communication in a hospital in the southwest part of China, the only

1 known attempt to apply PPOS in China. Despite its innovativeness, there were several  
2 limitations affecting this study. For example, as an instrument introduced from abroad,  
3 PPOS' psychometric properties, such as reliability and validity, have not been well  
4 tested in the Chinese context. Secondly, the preference of physicians in conducting  
5 patient-centered communication has not yet been explored. Finally, for a vast country  
6 with a population in the billions, a single survey conducted in a specific medical unit  
7 can hardly be considered representative. It is thus unclear how well this instrument  
8 would work in other regions and surroundings.

9 We conducted this research in Shanghai, which is among the most developed cities in  
10 China and possesses abundant high-quality medical resources. Our goal was to adapt  
11 PPOS to a Chinese (Mandarin) context and assess its psychometric properties  
12 systematically. Preferences of both patients and physicians toward patient-centered  
13 communication were measured using the Chinese-revised PPOS (CR-PPOS). In  
14 addition, factors that might exert influence on physicians' and patients' preferences  
15 concerning patient-centered communication were further explored.

## 16 ***Methods***

### 17 ***Description of the instrument***

18 Currently, PPOS has evolved into a version containing 18 items in two dimensions,  
19 Caring and Sharing<sup>[23]</sup>. The nine-item Caring subscale reflects the degree to which  
20 physicians care about providing warmth and emotional support and regard the patient  
21 as a whole person. The nine-item Sharing subscale reflects the degree to which  
22 physicians believe they should share decision making information and power with the  
23 patients<sup>[17]</sup>. A higher PPOS total score, as well as subscale scores, indicates a greater  
24 preference toward patient-centered style in clinical communication. Conversely, a low  
25 Caring score indicates a tendency toward a disease-centered style, while a low  
26 Sharing score indicates a tendency toward a doctor-centered style.

### 27 ***Translation and cultural adaption***

1  
2  
3 1 Having obtained from the original author permission to translate and develop the  
4  
5 2 PPOS in a Chinese context, scholars with academic backgrounds in medicine, public  
6  
7 3 health, and communication, as well as the Chinese and English languages, were  
8  
9 4 invited to translate the PPOS into Chinese(Mandarin).Afterward, the bilingual PPOS  
10  
11 5 versions were sent separately to five other advanced health practitioners for further  
12  
13 6 suggestions and modifications. The Chinese PPOS(C-PPOS) was then re-translated  
14  
15 7 into English and sent back to the original author for confirmation as to its accuracy.

16  
17  
18 8 For this C-PPOS, we strove to fit every item from the original version, except for item  
19  
20 9 17 due to noticeable culture difference. Thus, it was replaced by “A friendly manner is  
21  
22 10 a major ingredient in the doctor’s treatment of the patients”, which had been used in a  
23  
24 11 prior study in Nepal<sup>[24]</sup>. Additionally, item 2 was back-translated as “Compared with  
25  
26 12 centering on individual patients in the past, focusing on the comprehensive quality of  
27  
28 13 medical services nowadays is more valuable for propelling medical development,”  
29  
30 14 which differed from the original item, rendered as “Although health care is less  
31  
32 15 personal these days, this is a small price to pay for medical advances” in expression  
33  
34 16 but was mostly consistent in meaning. Finally, 12 physicians and 18 patients were  
35  
36 17 enrolled in cognitive interviews to further enhance the comprehensibility of the scale  
37  
38 18 in the Chinese cultural context.

### 39 ***Pilot study design***

40  
41  
42 20 A pilot study was conducted in eight clinical settings in Shanghai in 2015. To reduce  
43  
44 21 selection bias, four community hospitals and four general hospitals located in various  
45  
46 22 areas were selected to cover a broad population. As a minimum sample size of 5 to 10  
47  
48 23 times the number of scale items for exploratory factor analysis (EFA) and 10 to 20  
49  
50 24 times for confirmative factor analysis<sup>[25]</sup> was required, and allowing for a number of  
51  
52 25 probable invalid responses, we included 400 interviewees. It was assumed that  
53  
54 26 physicians should comprise at least 20% of the total sample. Physicians and patients  
55  
56 27 were recruited using a convenient sampling approach from the outpatient department  
57  
58 28 of each hospital. Every eligible participant was requested to complete an anonymous

1 short questionnaire containing the C-PPOS. Retrieved questionnaires were carefully  
2 checked, and those of poor quality were removed from the dataset, including those  
3 with missing item scores or with the same item score used throughout the entire scale.

#### 4 ***Psychometric properties assessment***

5 In this study, we assessed the psychometric properties via reliability, validity, and  
6 discriminative power tests, based on which the C-PPOS was revised to the CR-PPOS.

7 Internal consistency and test–retest reliability are the most widely used indicators for  
8 reliability; thus we performed both in this study. In the test–retest survey, 60  
9 participants completed the C-PPOS again after 2 to 4 weeks.

10 We performed EFA and confirmatory factor analysis (CFA) to assess construct  
11 validity. In addition, content validity was assessed by testing the correlation of the  
12 score of each item and the score of the subscale the item belonged to, as well as the  
13 score of the total scale.

14 Discriminative power reflects the extent to which an item can distinguish different  
15 levels of target variables. We tested discriminative power by comparing the critical  
16 value (CR) of each item.

#### 17 ***Formal study design***

18 The formal survey was launched 1 month later, in the same settings where the pilot  
19 study was conducted. As a cross-sectional study, the sample size was calculated to be  
20 664 according to the formula provided by Raosoft, Inc.<sup>[26]</sup>, within a total population  
21 size of 24,000,000 (the estimated population of Shanghai) and a confidence level of  
22 99%. It was then expanded to 750 to guarantee sufficient valid responses. Physician  
23 and patient participants were recruited with a convenience sampling strategy. After  
24 confirming the informed consent, participants were asked to complete a questionnaire  
25 containing the CR-PPOS, general information (gender, age, education, marriage status,  
26 socioeconomic status, etc.), and some other well-validated instruments, such as the

1 Patient Confidence in Communication Scale (PCCS)<sup>[27]</sup>, Hospital Anxiety and  
2 Depression Scale (HADS), the Rapid Health Literacy Scale<sup>[28]</sup> for patients, and the  
3 Maslach Burnout Inventory-General Survey (MBI-GS) and Medical Communication  
4 Competence Scale (MCCS)<sup>[29]</sup> for physicians.

### 5 *Statistical analysis*

6 We utilized Epidata 3.1 and Excel 2007 software for dataset establishment. IBM SPSS  
7 20.0 and AMOS 21.0 were employed to perform data cleaning and analysis.

8 Cronbach's  $\alpha$  coefficient was tested as the indicator of internal consistency and  
9 reliability. Normally, a Cronbach's  $\alpha$  of no less than 0.6 is deemed acceptable for an  
10 instrument with a relatively small number of items (i.e. no more than 6)<sup>[30]</sup>. Test-retest  
11 reliability was assessed as the indicator of interclass correlation coefficient (ICC).  
12 Test-retest reliability was considered poor if the ICC value was lower than 0.4 and/or  
13 the correlation was not statistically significant ( $P < 0.05$ ).

14 For EFA, data were subjected to a principal component analysis with extraction of  
15 eigenvalues (greater than 1) for subscales (EFA round 1) and fixed two factors for the  
16 total scale (EFA round 2). In EFA round 1, items were removed if a) their factor  
17 loadings under either dimension were greater than 0.4, b) their factor loadings under  
18 any two dimensions were close (the absolute value difference was less than 0.1), or c)  
19 they were the only item under one dimension<sup>[31]</sup>.

20 CFA was performed by maximum likelihood analysis to verify the main adjustment  
21 indices of the model, including chi-squared/degree of freedom ( $\chi^2/df$ ), root mean  
22 square error of approximation (RMSEA), goodness-of-fit index (GFI), adjusted  
23 goodness-of-fit index (AGFI), normed-fit index (NFI), incremental fit index (IFI), and  
24 comparative fit index (CFI). The recommended  $\chi^2/df$  ratio is 1 to 3, and RMSEA  
25 value  $< 0.08$  and GFI, AGFI, NNFI, IFI, and CFI  $> 0.9$  suggest ideal model fit<sup>[32]</sup>.

26 Respondents with the highest (top 27%) and lowest (bottom 27%) total scale scores

1 were divided into two groups, after which their CR values of each item were  
 2 compared to determine their discriminative power<sup>[33]</sup>. The items without significantly  
 3 distinct CRs were eliminated as they lacked the ability to distinguish high scores and  
 4 low scores.

5 For single factor analysis, we performed the t-test and analysis of variance (ANOVA)  
 6 for parameter testing, and the Mann–Whitney U test for non-parameter testing.  
 7 Multiple linear regression (MLR) was utilized in processing multifactor analysis.  
 8 Only cases with complete data were included in the analysis. Statistical significance  
 9 was set at  $P < 0.05$ .

## 10 **Results**

### 11 **Pilot study**

#### 12 **Participants**

13 Three hundred and sixty-two eligible questionnaires were included in the pilot study  
 14 from 395 participants, with a valid response rate of 91.65%. The mean age of the  
 15 respondents was  $47.41 \pm 18.42$ , and approximately half of them had graduated from  
 16 college (Table 1).

#### 17 **Table 1**

18 Demographic characteristics of the pilot study sample (n=362)

| Demographic characteristics | Physicians (n=71) | Patient (n=291) |
|-----------------------------|-------------------|-----------------|
| <b>Mean age (range)</b>     | 39.39 (24–64)     | 49.43 (20–96)   |
| <b>Gender, n (%)</b>        |                   |                 |
| Male                        | 33(46.5%)         | 123 (42.3%)     |
| Female                      | 38(53.5%)         | 165 (56.6%)     |
| <b>Education, n (%)</b>     |                   |                 |
| College and above           | 67 (94.4%)        | 112 (38.5%)     |

|          |            |
|----------|------------|
| 4 (5.6%) | 83 (28.5%) |
| 0        | 72 (24.7%) |
| 0        | 12 (4.1%)  |

**Setting, n (%)**

|                    |            |             |
|--------------------|------------|-------------|
| Community hospital | 42 (59.2%) | 130 (44.7%) |
| General hospital   | 29 (40.8%) | 161 (55.3%) |

**Confirmatory factor analysis of the C-PPOS**

The CFA of the C-PPOS indicated poor model fit (Table 2), which called for further revision.

**Table 2**

Goodness-of-fit indices of the CFA of the CR-PPOS and the original C-PPOS

| Model fit indicator | Two factors<br>(18 items) | Two factors<br>(11 items) | Reference value |
|---------------------|---------------------------|---------------------------|-----------------|
| $\chi^2/df$         | 5.04                      | 1.85                      | <3              |
| P-value             | <0.001                    | <0.001                    | >0.05           |
| RMSEA               | 0.11                      | 0.06                      | <0.08           |
| GFI                 | 0.76                      | 0.94                      | >0.90           |
| AGFI                | 0.70                      | 0.90                      | >0.90           |
| NFI                 | 0.52                      | 0.81                      | >0.90           |
| IFI                 | 0.58                      | 0.90                      | >0.90           |
| CFI                 | 0.57                      | 0.90                      | >0.90           |

**Revision of the C-PPOS**

The Cronbach's  $\alpha$  of each subscale of C-PPOS was tested as the first step of item reduction. The Cronbach's  $\alpha$  of C-PPOS was 0.668, with a Caring subscale score of



1 0.493 and a Sharing subscale of 0.575, showing poor internal consistent reliability.  
2 Hence, items were eliminated in a stepwise manner for each subscale separately until  
3 elimination of another item would lead to a decrease in the Cronbach's  $\alpha$  of its  
4 corresponding dimension. Finally, five out of nine items were retained in the Caring  
5 subscale, and eight out of nine items (except for C-PPOS9) were retained in the  
6 Sharing subscale.

7 In EFA, the Bartlett's sphericity test reported a Chi-square value of 112.364 ( $p < 0.001$ )  
8 for the Caring subscale and 146.846 ( $p < 0.001$ ) for the Sharing subscale. The Kaiser–  
9 Meyer–Olkin (KMO) indices for the two subscales were 0.727 and 0.694, respectively.  
10 For EFA round 1, all five of the retained items of the Caring subscale were under one  
11 principal component, which had an eigenvalue greater than 1 (2.197), explaining  
12 43.949% of the total variance. In the Sharing subscale, C-PPOS4 and C-PPOS10 were  
13 removed as they met exclusion criteria. Afterward, EFA was performed again on the  
14 six retained items of the Sharing subscale. This time all six items grouped under one  
15 principal component (eigenvalue=2.247), which explained 37.448% of the total  
16 variance. Subsequently, a fixed two-factor EFA was performed to verify the construct  
17 of the merged 11-item scale. The result indicated that the five items of the Caring  
18 subscale and the six items of the Sharing subscale were well separated, explaining  
19 41.67% of the total variance.

20 CFA was performed with the 11-item revised C-PPOS (CR-PPOS, see supplementary  
21 appendix), according to the prior model, indicating a more acceptable and greatly  
22 improved model fit compared with the original scale (Table 2).

### 23 ***Reliability of the CR-PPOS***

24 The Cronbach's  $\alpha$  of the entire CR-PPOS was 0.735, with 0.709 in the Caring  
25 subscale and 0.644 in the Sharing subscale. Furthermore, the scores of the two  
26 subscales were significantly correlated to the total scale, with Spearman coefficients  
27 of 0.744 (Caring) and 0.840 (Sharing), which were higher than those of these two

1 subscales (0.312). The ICC was 0.787 for the CR-PPOS, 0.911 for the Caring subscale,  
 2 and 0.602 for the Sharing subscale. The ICC for the 11 single items ranged from 0.481  
 3 to 0.812. The correlations were all statistically significant ( $p < 0.001$ ), indicating  
 4 satisfactory test–retest reliability.

### 5 *Validity of the CR-PPOS*

6 The construct validity was well verified through EFA and CFA (see above). As for  
 7 content validity, the 11 items' scores and their corresponding subscales' scores were  
 8 all significantly correlated ( $p < 0.01$ ), with Spearman coefficients ranging from 0.452  
 9 to 0.717.

### 10 *Discriminative power of the CR-PPOS*

11 The CR values of the 11 items were all less than 0.01, reaching statistically significant  
 12 levels. Thus, the items retained in the CR-PPOS had good discriminative power.

### 13 *Formal study*

#### 14 *Participants*

15 Six hundred and fifty-six eligible questionnaires out of 792 participants were retrieved  
 16 in this stage, with a valid response rate of 82.83%. One hundred and sixteen  
 17 physicians and 540 patients were included. Respondents' demographic information is  
 18 partly shown in Tables 3 and 4.

19 **Table 3**

20 Physicians' demographic characteristics (partly) and CR-PPOS scores

| Demographic characteristics | Number (percentage) | Caring subscale | Sharing subscale | CR-PPOS total |
|-----------------------------|---------------------|-----------------|------------------|---------------|
| <b>Gender</b>               |                     |                 |                  |               |
| Male                        | 43 (37.1%)          | 4.75±0.95       | 2.81±0.79        | 3.62±0.62     |

|   |       |         |            |           |           |           |
|---|-------|---------|------------|-----------|-----------|-----------|
| 1 | *     | Female  | 73 (62.9%) | 4.68±0.74 | 3.01±0.77 | 3.68±0.57 |
| 2 | p<0.0 | P value |            | 0.666     | 0.166     | 0.648     |

3 5

#### Age (Group)

#### Table

|   |         |         |            |           |           |           |
|---|---------|---------|------------|-----------|-----------|-----------|
| 6 | 4       | -35     | 50 (43.1%) | 4.78±0.96 | 2.89±0.71 | 3.69±0.61 |
| 7 | Patient | -50     | 52 (44.8%) | 4.69±0.63 | 2.92±0.85 | 3.63±0.52 |
| 8 | s'      | 51-     | 10 (8.7%)  | 4.74±0.36 | 3.33±0.66 | 3.90±0.41 |
| 9 | demo    | P value |            | 0.827     | 0.247     | 0.363     |

10 graph

11 ic

#### Education

12 chara

|    |        |                        |            |           |           |           |
|----|--------|------------------------|------------|-----------|-----------|-----------|
| 13 | cteris | Senior school or below | 2 (1.7%)   | 4.20±0.00 | 3.00±0.17 | 3.41±0.14 |
| 14 | tics   | College                | 71 (61.2%) | 4.69±0.87 | 3.04±0.76 | 3.69±0.64 |
| 15 | (partl | Postgraduate           | 42 (36.2%) | 4.78±0.75 | 2.75±0.80 | 3.61±0.51 |
| 16 | y)     | P value                |            | 0.572     | 0.161     | 0.672     |

17 and

18 CR-P

#### Marriage status

19 POS

|    |       |           |            |           |           |           |
|----|-------|-----------|------------|-----------|-----------|-----------|
| 20 | score | Married   | 89 (76.7%) | 4.69±0.76 | 2.91±0.77 | 3.64±0.53 |
| 21 | s     | Unmarried | 26 (22.4%) | 4.88±0.82 | 3.08±0.74 | 3.82±0.61 |
|    |       | P value   |            | 0.270     | 0.318     | 0.149     |

| Demographic characteristics | Number (percentage) | Caring subscale | Sharing subscale | CR-PPOS total |
|-----------------------------|---------------------|-----------------|------------------|---------------|
|-----------------------------|---------------------|-----------------|------------------|---------------|

#### Gender

|        |             |           |           |           |
|--------|-------------|-----------|-----------|-----------|
| Male   | 195 (36.1%) | 4.11±0.95 | 3.17±0.74 | 3.49±0.71 |
| Female | 330 (61.1%) | 4.07±0.96 | 3.09±0.77 | 3.44±0.69 |

P value 0.574 0.295 0.468

### Age (Group)

|         |             |           |           |           |
|---------|-------------|-----------|-----------|-----------|
| -35     | 175 (32.4%) | 4.24±0.91 | 3.32±0.68 | 3.59±0.67 |
| -50     | 102 (18.9%) | 4.00±1.00 | 3.02±0.83 | 3.37±0.75 |
| -65     | 129 (23.9%) | 3.93±1.02 | 3.00±0.76 | 3.35±0.72 |
| 66–     | 107 (19.8%) | 4.14±0.86 | 3.12±0.77 | 3.50±0.64 |
| P value |             | 0.034*    | 0.001*    | 0.009*    |

### Education

|                         |             |           |           |           |
|-------------------------|-------------|-----------|-----------|-----------|
| Primary school or below | 39 (7.2%)   | 3.93±1.00 | 2.97±0.81 | 3.29±0.78 |
| Junior school           | 112 (20.7%) | 3.89±0.95 | 2.99±0.77 | 3.29±0.67 |
| Senior school           | 162 (30.0%) | 4.06±0.95 | 3.12±0.71 | 3.46±0.69 |
| College or above        | 203 (37.6%) | 4.26±0.93 | 3.23±0.80 | 3.59±0.70 |
| P value                 |             | 0.007*    | 0.030*    | 0.002*    |

### Personal income (CNY)

|         |             |           |           |           |
|---------|-------------|-----------|-----------|-----------|
| <1500   | 23 (4.3%)   | 3.91±0.93 | 2.96±0.83 | 3.27±0.61 |
| -3000   | 105 (19.4%) | 3.83±1.02 | 2.96±0.83 | 3.23±0.77 |
| -5000   | 192 (35.6%) | 4.14±0.95 | 3.16±0.79 | 3.51±0.71 |
| -10000  | 115 (21.3%) | 4.17±0.94 | 3.13±0.68 | 3.54±0.63 |
| 10000–  | 70 (13.0%)  | 4.11±0.97 | 3.26±0.73 | 3.48±0.73 |
| P value |             | 0.048*    | 0.088     | 0.006*    |

### Experience as medical staff

|         |             |           |           |           |
|---------|-------------|-----------|-----------|-----------|
| Yes     | 27 (5.0)%   | 3.67±1.07 | 2.84±0.76 | 3.12±0.80 |
| No      | 241 (44.6%) | 4.05±1.00 | 3.22±0.75 | 3.46±0.75 |
| P value |             | 0.071     | 0.013*    | 0.028*    |

---

\*p<0.05

### 3 ***Comparison of physicians' and patients' CR-PPOS scores***

4 The physicians received an average CR-PPOS score of 3.66±0.59, and the patients' average score was significantly lower (3.46±0.70). The physicians scored higher in Caring (4.71±0.82 vs. 4.08±0.95), while the patients scored higher in Sharing (3.13±0.76 vs. 2.94±0.78). The differences were all statistically significant (p<0.05).

### 8 ***Demographic characteristics and CR-PPOS scores***

9 The scores of physicians and patients with distinct demographic characteristics were compared, as partly listed in Tables 3 and 4. Both patients' age and education level were significantly associated with their scores on the Caring subscale(p<0.05), the Sharing subscale(p<0.001) and the total CR-PPOS(p<0.01). Patients' income was only significantly associated with the Caring subscale score(p<0.05) and the total CR-PPOS score(p<0.01). Furthermore, patients' experience as medical staff was likely to improve their scores on the Sharing subscale(p<0.05) and the total CR-PPOS(p<0.05). However, no associations of such were found among physicians.

### 17 ***Physicians' burnout and CR-PPOS scores***

18 The burnout level of physicians was measured by the MBI-GS. According to the data, the group of "relatively severe" (scoring 3–5) and the group of "extremely severe" (scoring 5 or above) were merged as a "severe" group (scoring 3 or above), compared with the "light" group (scoring 3 or below). Physicians who reported "severe" burnout scored significantly lower in both the Caring subscale and the total scale than those

1 reporting “light” burnout.

2 ***Physicians’ medical communication competency and CR-PPOS scores***

3 Ninety-nine percent of physicians completed the MCCS, which was used to assess the  
4 medical communication competency of both physicians and patients. Although  
5 physicians were normally assessed by their patients using MCCS, we transformed this  
6 into a self-reported scale for physicians in this study. The results indicated that,  
7 although the scores of the four dimensions of MCCS were related, no correlation was  
8 found between the MCCS scores and the CR-PPOS scores as well as its subscales.

9 ***Patients’ anxiety and depression and CR-PPOS scores***

10 Five hundred and two patients finished the HADS, an instrument for rapidly screening  
11 anxiety and depressive symptoms among clinic physicians and patients. With the  
12 cut-off point of 11, 309 patients (57.2%) were determined to be anxiety-positive, and  
13 277 (51.3%) were determined as depression-positive. Meanwhile, it should be noticed  
14 that HADS can only be used for screening purposes<sup>[34]</sup>, so the positive results cannot  
15 be equal to the anxiety/depression with clinical significance.

16 As anxiety and depressive symptoms were highly comorbid<sup>[35]</sup>, a two-way ANOVA  
17 was performed as the first stage to explore whether an interaction effect existed. It  
18 turned out that there was no interaction effect between anxiety and depression.  
19 Anxiety was found to lead to a decrease in patients’ scores on both the Caring  
20 subscale ( $p<0.01$ ) and the total CR-PPOS ( $p<0.05$ ). However, patients’ scores on  
21 neither the total scale nor the subscales seemed to be influenced by their depressive  
22 symptoms.

23 ***Patients’ health literacy, PCCS, and CR-PPOS scores***

24 Using the three-item Rapid Health Literacy Scale, no statistical difference was found  
25 in the total CR-PPOS score and the two subscale scores between the poor literacy  
26 group and the adequate literacy group, while patients’ health literacy scores showed a

1 significantly positive correlation with their Sharing subscale scores ( $r_s=0.112$ ,  
 2  $p=0.011$ ). Similarly, patients' confidence in medical communication, as measured by  
 3 PCCS was inversely correlated with their scores on the Sharing subscale ( $r_s=-0.261$ ,  
 4  $p<0.001$ ). In the following partial correlation tests, the correlation between PCCS and  
 5 the Sharing subscale score remained significant after controlling for the health literacy  
 6 score ( $r_s=-0.232$ ,  $p<0.001$ ), while no correlation existed between the health literacy  
 7 score and the Sharing subscale score after controlling for PCCS.

### 8 *Multivariable analysis*

9 After testing the feasibility, MLR showed that the total burnout level might be an  
 10 influential factor for the physicians in Caring and total CR-PPOS scores, and more  
 11 factors were associated with the CR-PPOS scores of the patients (Table 5).

12 **Table 5**

13 Variables influencing CR-PPOS scores

| Dimension         | Variables                   | B      | 95% CI           | P     |
|-------------------|-----------------------------|--------|------------------|-------|
| <b>Physicians</b> |                             |        |                  |       |
| Caring subscale   | Total burn-out              | -0.417 | (-0.801, -0.033) | 0.034 |
| Sharing subscale  | -                           | -      | -                | -     |
| CR-PPOS total     | Total burn-out              | -0.341 | (-0.611, -0.071) | 0.014 |
| <b>Patients</b>   |                             |        |                  |       |
| Caring subscale   | Age (Group)                 | -0.292 | (-0.499, -0.086) | 0.006 |
|                   | Education                   | 0.251  | (0.079, 0.423)   | 0.005 |
|                   | Experience as medical staff | 0.538  | (0.046, 1.029)   | 0.032 |
| Sharing subscale  | Age (Group)                 | -0.202 | (-0.361, -0.043) | 0.013 |

|               |                                     |        |                  |        |
|---------------|-------------------------------------|--------|------------------|--------|
|               | Education                           | 0.169  | (0.039, 0.299)   | 0.011  |
|               | Experience as medical staff         | 0.481  | (0.109, 0.852)   | 0.012  |
|               | Marriage status                     | -0.336 | (-0.666, -0.006) | 0.046  |
|               | Confidence in medical communication | -0.298 | (-0.451, -0.146) | <0.001 |
| CR-PPOS total | Age (Group)                         | -0.242 | (-0.396, -0.087) | 0.002  |
|               | Education                           | 0.222  | (0.093, 0.350)   | 0.001  |
|               | Experience as medical staff         | 0.521  | (0.154, 0.887)   | 0.006  |

1

## 2 *Discussion*

3 Although the PPOS has been widely used in various languages, only a few studies  
 4 have systematically tested its psychometric property<sup>[36-38]</sup>, and no related results have  
 5 been reported in China to date. This study showed that neither the ICC of the overall  
 6 18-item C-PPOS nor its two subscales were above 0.7, which was comparable to the  
 7 existing research. Deletion of items 9 and 17 improved the Cronbach's  $\alpha$ , which is  
 8 consistent with a study conducted in Sri Lanka<sup>[39]</sup>. After modification, the two  
 9 subscales of the 11-item PPOS were well separated in a fixed-factor EFA, with better  
 10 indexes than prior similar studies, and the overall scale validity was reconfirmed by  
 11 CFA. Taking into account the test-retest reliability and discriminative power, the  
 12 11-item CR-PPOS obtained better psychometric property than the original 18-item  
 13 scale. Thus, the CR-PPOS is considered to have greater applicability in the Chinese  
 14 context.

15 Using the 11-item CR-PPOS, physicians and patients indicated similar trends in the  
 16 achieved scores. In the overall scale, they both obtained medium scores (around the  
 17 median value of 3.5), and both had relatively high Caring scores (over 4.0) and low  
 18 Sharing scores (around 3.0 or below). This indicated that, although physicians and



1 patients generally showed a medium level of patient-centeredness in clinical  
2 communication, they expressed higher preferences toward caring from a  
3 biopsychosocial perspective than shared information and involvement in decision  
4 making. Although the physicians' data is still absent in China, the 95% confidence  
5 interval of the mean score of patients in this study slightly overlapped with that of the  
6 prior study<sup>[22]</sup>, which implied that Chinese patients might express similar preferences  
7 toward patient-centered communication, regardless of the regions they were living in.  
8 The differences between the scores of physicians and patients, however, may still  
9 prompt the gap in Chinese physicians and patients regarding their understanding and  
10 expectations in clinical communication. Comparing the data of this study with that  
11 from abroad, the majority showed a similar pattern that physicians were more  
12 patient-centered in Caring than in Sharing, but there were still two exceptions; the  
13 surveys conducted in Portugal and Australia indicated opposite results<sup>[40,41]</sup>, which  
14 may be due to the difference in physician training modes and local health systems.  
15 Thus, further research is needed to determine the reasons for such a distinction.

16 Preference toward patient-centered communication, as measured by the PPOS, has  
17 been reported to be influenced by both personal characteristics and social  
18 environmental factors. This study represents the first attempt to detect the potential  
19 influential factors of patient-centered communication among Chinese physicians. The  
20 results showed no association between the CR-PPOS scores and physicians' gender,  
21 age, education level, career length, or type of setting. These results were consistent  
22 with several prior studies in other countries, though female physicians were found to  
23 score significantly higher than their male colleagues in some studies<sup>[42,43]</sup>. Apart from  
24 these factors, which were frequently mentioned in the existing research, we found that  
25 burnout level might exert impact on physicians' PPOS total score as well as their  
26 Caring subscale score, indicating that physicians with a higher total burnout level  
27 were generally less likely to be patient-centered in clinical communication. Although  
28 we assumed that poor communication ability might relate to a lower preference for  
29 patient-centeredness in communication, no link was found between physicians'

1  
2  
3  
4 1 medical communication competency, as measured by MCCS and their PPOS scores in  
5  
6 2 this study.

7  
8 3 As Ting<sup>[22]</sup> reported, age and education mainly influenced Chinese patients' overall  
9  
10 4 preference on patient-centered communication. In this study, younger and/or  
11  
12 5 better-educated patients also expressed a higher preference for patient-centered  
13  
14 6 communication in both the Caring and Sharing dimensions. Although some studies  
15  
16 7 have reported a gender difference<sup>[36,39,44,45]</sup>, it seemed that for Chinese patients, age  
17  
18 8 and education level, rather than gender, contribute to the different preferences toward  
19  
20 9 patient-centered communication. Meanwhile, the type of setting and socio- economic  
21  
22 10 status are not considered as influential factors, which was controversial<sup>[46]</sup>. One  
23  
24 11 interesting find was that possessing experience as medical staff decreased the extent  
25  
26 12 to which patients wanted a patient-centered communication style. A plausible  
27  
28 13 explanation is that those who had worked as medical staff had obtained a more  
29  
30 14 comprehensive understanding of how hospitals function than those who had not. Thus,  
31  
32 15 they subconsciously lowered their expectation of a patient-centered manner in  
33  
34 16 communication, which might raise the demand for physicians, due to their sympathy  
35  
36 17 toward the physicians for their heavy workload. Further, although anxiety seemed to  
37  
38 18 be influential in single factor analysis, the association between the CR-PPOS score  
39  
40 19 and anxiety disappeared in the multivariable analysis, implying that anxiety was more  
41  
42 20 likely to be a confounder. Meanwhile, there is a need to further probe the role of  
43  
44 21 patient communication confidence, as well as its seeming mediation effect on the  
45  
46 22 relationship between patients' health literacy and preference for shared information  
47  
48 23 and decision making.

49  
50 24 The main limitation of this study lies in that, due to feasibility considerations, the  
51  
52 25 participants were only recruited from a limited number of medical units, and a  
53  
54 26 convenient sampling strategy was adopted. Hence, though we have made some efforts  
55  
56 27 to reduce it, selection bias might still be a major issue, which could influence the  
57  
58 28 external validity of the findings in this study. Namely, although the CR-PPOS itself  
59  
60 29 can be well generalized to other studies aiming at a Chinese-speaking population, the

1  
2  
3 1 extent to which patient-centered communication is preferred and how it is influenced  
4  
5 2 can be different. Another point to be noticed is, as the CR-PPOS was developed from  
6  
7 3 the PPOS following a standardized statistical process, without any extra items being  
8  
9 4 added to keep the numbers of items constant, it may be inappropriate to directly  
10  
11 5 compare the scores measured by the CR-PPOS and the PPOS.

12  
13  
14 6 Considering the deteriorating physician-patient relationships in current Chinese  
15  
16 7 society, this study has significant implications for medical practice. With the valid  
17  
18 8 instrument CR-PPOS, on one hand, the divergence in communication preference  
19  
20 9 between physicians and patients can be discovered. On the other hand, it will be  
21  
22 10 possible and reasonable to link certain personal characteristics with individuals'  
23  
24 11 preference toward clinical communication, and in China that is particularly true for  
25  
26 12 patients according to this study. Based on these findings, specific training can be  
27  
28 13 developed and offered to physicians, guiding them on how to recognize patients with  
29  
30 14 different communication preferences and to adopt corresponding communication  
31  
32 15 strategies afterwards. In this way not only patients' expectations are better fulfilled,  
33  
34 16 but communication efficiency is also enhanced, both contributing to reduced  
35  
36 17 complaints in clinical communication, and improved physician-patient  
37  
38 18 relationships<sup>[47]</sup>.

### 39 **Conclusion**

40  
41  
42 20 The CR-PPOS was developed as an applicable instrument to measure the preference  
43  
44 21 toward patient-centered communication of physicians and patients in a Chinese  
45  
46 22 context. Physicians and patients were generally more patient-centered in medical  
47  
48 23 communication regarding overall biopsychosocial care than with respect to shared  
49  
50 24 information and decision making, but there were still significant gaps between  
51  
52 25 physicians and patients in the extent to which they prefer this type of communication.  
53  
54 26 Relieving burnout could help physicians to be more patient-centered in  
55  
56 27 communication. Patients of a young age, high education level, and with medical staff  
57  
58 28 experience tended to have a higher preference toward patient-centered

1 communication.

2

3 **Competing interests:** All authors have completed the ICMJE uniform disclosure  
4 form at [www.icmje.org/coi\\_disclosure.pdf](http://www.icmje.org/coi_disclosure.pdf) and declare: Jie Wang had financial  
5 support from the China Postdoctoral Science Foundation for the submitted work, Fan  
6 Wang has received funds from Shanghai Health and Family Planning Commission; no  
7 financial relationships with any organizations that might have an interest in the  
8 submitted work in the previous three years; no other relationships or activities that  
9 could appear to have influenced the submitted work.

10

11 **Ethics committee approval information:** The study was approved by Fudan  
12 University School of Public Health Institutional Review Board (No.  
13 IRB#2015-12-0575).

14

15 **Contributors:** Jie Wang was granted research funding, engaged in the study design  
16 and data analysis, and was the main drafter of the Introduction and Discussion  
17 sections; Runyu Zou led the study design, data collection, and data analysis, and also  
18 drafted the Method, and Results sections of the manuscript; Hua Fu and Fan Wang  
19 were the co-principal investigators of this project, were granting research funding, and  
20 mentored in the study design, data collection, and article revision. They also issued  
21 the final approval for submission; Haihong Qian and Yueren Yan contributed to data  
22 collection and refining the article. All authors have approved the final version of this  
23 manuscript.

24 **Acknowledgments:** We appreciate Professor Edward Krupat of Harvard University  
25 for his generous authorization to use and revise the PPOS for the Chinese context. We  
26 are also grateful to the coordinators of the collaborating hospitals for their kind  
27 assistance.

28 **Funding:** This work was supported by the first-class [General Financial Grant from  
29 the China Postdoctoral Science Foundation] grant number [2015M580283] and

1 [Construction of the key disciplines of the fourth round public health three-year action  
2 plan of Shanghai Health and Family Planning Commission] grant number  
3 [15GWZK1001].

4 **Data Sharing Statement:** Extra data from this study could be accessed by contacting  
5 the corresponding author Fan Wang via wangfan512@126.com.

6 Detail has been removed from this case description/these case descriptions to ensure  
7 anonymity. The editors and reviewers have seen the detailed information available  
8 and are satisfied that the information backs up the case the authors are making.

9

## 10 Reference

11 1 Balint E, Ball D, Hare M. Training medical students in patient-centered medicine,  
12 *Compr Psychiatry*1969;10:249-58.

13 2 Hirono I, Hideki H, Takahiro K. The evolving concept of “patient-centeredness” in  
14 patient-physician communication research, *Soc Sci Med*2013;96:147-53.

15 3 Institute of Medicine. Crossing the quality chasm: a new health system for the 21st  
16 century. Washington (DC):National Academies Press 2001:39-40.

17 4 Mohammed A, Mannan F, Chaudhry Z, et al. Quality of care in university hospitals  
18 in Saudi Arabia: a systematic review. *BMJ Open*2016;6(2):e008988.

19 5 Catro EM, van Regenmortel T, Vanhaecht K, et al. Patient empowerment, patient  
20 participation and patient-centeredness in hospital care: A concept analysis based on a  
21 literature review. *Patient Educ Couns*2016;99:1923-39.

22 6 Skelton J. Language and Clinical Communication: this bright Babylon. Oxford:  
23 Radcliffe Publishing 2008:93-98.

24 7 Stewart M, Brown JB, Weston WW, et al. Patient-centered medicine: transforming  
25 the clinical method, 2nd edn. United Kingdom: Radcliffe Medical Press 2003:5-16.

26 8 Hudon C, Fortin M, Haggerty JL, et al. Measuring patients’ perceptions of  
27 patient-centered care: a systematic review of tools for family medicine. *Ann Fam  
28 Med*2011;9:155-64.

- 1  
2  
3 1 9 Epstein RM, Franks P, Fiscella K, et al. Measuring patient-centered communication  
4  
5 2 in patient-physician consultations: theoretical and practical issues. *Soc Sci*  
6  
7 3 *Med*2005;61:1516-28.  
8  
9 4 10 Bensing JM, Verhaak PF, van Dulmen AM, et al. Communication: the royal  
10  
11 5 pathway to patient-centered medicine. *Patient Educ Couns*2000;39:1-3.  
12  
13 6 11 Mead N, Bower P. Patient-centeredness: a conceptual framework and review of the  
14  
15 7 empirical literature. *Soc Sci Med*2000;51:1087-10.  
16  
17 8 12 Taylor K. Paternalism, participation and partnership-the evolution of  
18  
19 9 patient-centeredness in the consultation. *Patient Educ Couns*2009;74:150-55.  
20  
21 10 13 Greenfield S, S. Kaplan, J. Ware, E.M. Yano, H. Frank, Patients' participation in  
22  
23 11 medical care. *J Gen Intern Med*1988;88:448-57.  
24  
25 12 14 Marinker M. From compliance to concordance: achieving shared goals in medicine  
26  
27 13 taking. *Brit Med J*1997;314:747-8.  
28  
29 14 15 Schiavo R. Health Communication: From Theory to Practice, 2<sup>nd</sup> edn. San  
30  
31 15 Francisco: Jossay-Bass 2013:195-96.  
32  
33 16 16 Morris MA, Clayman ML, Peters KJ, et al. Patient-centered communication  
34  
35 17 strategies for patients with aphasia: discrepancies between what patients want and  
36  
37 18 what physicians do. *Disabil Health J*2015;8:208-15.  
38  
39 19 17 Krupat E, Hiam CM, Fleming MZ, et al. Patient-centeredness and its correlates  
40  
41 20 among first year medical students. *Int J Psychiatry Med*1999;29:347-56.  
42  
43 21 18 Kim J. Differences in attitude toward patient-centeredness in patients and  
44  
45 22 physicians. *Korean J Med Educ*2013;25:149-56.  
46  
47 23 19 Ishikawa I, Eto M, Kitamura K, et al. Resident physicians' attitudes and  
48  
49 24 confidence in communicating with patients: A pilot study at a Japanese University  
50  
51 25 hospital. *Patient Educ Couns*2014;96:361-66.  
52  
53 26 20 Tsimtsiou Z, Kirana PS, Hatzichristou D. Determinants of patients' attitudes  
54  
55 27 toward patient-centered care: A cross-sectional study in Greece. *Patient Educ*  
56  
57 28 *Couns*2014;97:391-95.  
58  
59 29 21 Dockens AL, Bellon-Harn ML, Manchaiah V. Preference to patient-centeredness in  
60  
30 pre-service speech and hearing sciences students: a cross-sectional study. *J Audiol*

- 1  
2  
3  
4 1 *Otol*2016;20:73-9.
- 5  
6 2 22 Xu T, Bao Y, Liang Y, et al. Patient perception and the barriers to practicing  
7  
8 3 patient-centered communication: A survey and in-depth interview of Chinese patients  
9  
10 4 and physicians. *Patient Educ Couns*2016;99:364-69.
- 11  
12 5 23 Krupat E, Rosenkranz SL, Yeager CM, et al. The practice orientations of  
13  
14 6 physicians and patients: the effect of doctor-patient congruence on satisfaction.  
15  
16 7 *Patient Educ Couns*2000;39:49-59.
- 17  
18 8 24 Moore M. What does patient-centered communication mean in Nepal? *Med*  
19  
20 9 *Educ*2008;42:18-26.
- 21  
22 10 25 Hair Jr JF, Black WC, Babin BJ, et al. *Multivariate Data Analysis*, 7th edn. Beijing:  
23  
24 11 China Machine Press 2011:100-123.
- 25  
26 12 26 Raosoft Inc. Sample size calculation [online]. [www.raosoft.com/samplesize.html](http://www.raosoft.com/samplesize.html).
- 27  
28 13 27 Tran A, Haidet P, Street R, et al. Empowering communication: a community-based  
29  
30 14 intervention for patients. *Patient Educ Couns*2004;52:113-21.
- 31  
32 15 28 Chew LD, Bradley KA, Boyko EJ. Brief questions to identify patients with  
33  
34 16 inadequate health literacy. *Fam Med*2004;36:588-94.
- 35  
36 17 29 Cegala DJ, Coleman MT, Warisse J. The development and partial test of the  
37  
38 18 Medical Communication Competence Scale (MCCS). *J Health*  
39  
40 19 *Commun*1998;10:261-88.
- 41  
42 20 30 Ponterotto JG, Ruckdeschel DE. An overview of coefficient alpha and a reliability  
43  
44 21 matrix for estimating adequacy of internal consistency coefficients with psychological  
45  
46 22 research measures. *Percept Mot Skills*2007;105:997-1014.
- 47  
48 23 31 Osborne JW, Costello AB. Best practices in exploratory factor analysis: four  
49  
50 24 recommendations for getting the most from your analysis. *Pract Assess Res Eval*  
51  
52 25 2005;10:1-9.
- 53  
54 26 32 Brown TA. *Confirmatory factor analysis for applied research*, 2<sup>nd</sup> edn. New York:  
55  
56 27 The Guilford Press 2015:67-73.
- 57  
58 28 33 Backhoff E, Larrazolo N, Rosas M. The level of difficulty and discrimination  
59  
60 29 power of Basic Knowledge and Skill Examination (EXHCOBA). *Revista Electrónica*  
30 *de Investigación Educativa* 2000;2:1-16. Retrieved on December 20, 2016 from:



- 1 <http://redie.uabc.mx/vol2no1/contents-backhoff.html>
- 2
- 3
- 4
- 5 34 Snaith RP. The hospital anxiety and depression scale. *Health Qual Life*
- 6
- 7 *Outcomes*2003;1:29.
- 8
- 9 35 Wu Z, Fang Y. Comorbidity of depressive and anxiety disorders: challenges in
- 10
- 11 diagnosis and assessment. *Shanghai Arch Psychiatry*2014;26:227-31.
- 12
- 13 36 Krupat E, Yeager CM, Putnam S. Patient role orientations, doctor-patient fit, and
- 14
- 15 visit satisfaction. *Psychol Health*2000;15:707-19.
- 16
- 17 37 Pereira CM, Amaral CF, Ribeiro MM, et al. Cross-cultural validation of the
- 18
- 19 Patient-Practitioner Orientation Scale. *Patient Educ Couns*2013;91:37-43.
- 20
- 21 38 Kiessling C, Fabry G, Rudolf Fisher M, et al. German translation and construct
- 22
- 23 validation of the Patient-Provider Orientation Scale(PPOS-D12). *Psychother*
- 24
- 25 *Psychsom Med Psychol*2014;64:122-27.
- 26
- 27 39 Mudiyanse RM, Pallegame RW, Jayalath T, et al. Translation and validation of the
- 28
- 29 Patient-Practitioner Orientation Scale in Sri Lanka. *Educ Health(Ablington)*
- 30
- 31 2015;28:35-40.
- 32
- 33 40 Laplante-Levesque A, Hickson L, Grenness C. An Australian survey of
- 34
- 35 audiologists' preferences for patient-centeredness. *Int J Audiol*2014;53:S76-82.
- 36
- 37 41 Manchiah V, Gomersall PA, Tome D, et al. Audiologists' preferences for
- 38
- 39 patient-centeredness: a cross sectional questionnaire study of cross-cultural
- 40
- 41 differences and similarities among professionals in Portugal, India and Iran. *BMJ*
- 42
- 43 *Open*2014;4:e005915.
- 44
- 45 42 Abiola T, Udofia O, Abdullahi AT. Patient-doctor relationship: the practice
- 46
- 47 orientations of doctors in Kano. *Niger J Clin Pract*2014;17:241-47.
- 48
- 49 43 Mann KJ, Hoffman A, Miller D, et al. The effect of a patient- and family-centered
- 50
- 51 care curriculum on pediatric residents' patient-centeredness. *J Grad Med*
- 52
- 53 *Educ*2013;5:36-40.
- 54
- 55 44 Krupat E, Hsu J, Irish J, et al. Matching patients and practitioners based on beliefs
- 56
- 57 about care: Results of a randomized controlled trial. *Am J Manag Care*
- 58
- 59 2004;10:814-22.
- 60
- 61 45 Lau SR, Christensen ST, Andreason JT. Patients' preferences for patient-centered



- 1  
2  
3 1 communication: a survey from an outpatient department in rural Sierra Leone. *Patient*  
4 *Educ Couns*2013;93:312-18.  
5  
6  
7 3 46 Little P, Everitt H, Williamson I, et al. Preferences of patients for patient-centered  
8  
9 4 approach to consultation in primary care: observational study. *BMJ*2001;322:468-72.  
10  
11 5 47 Liu X, Rohrer W, Luo A, et al. Doctor-patient communication skills training in  
12  
13 6 mainland China: A systematic review of the literature. *Patient Educ*  
14  
15 7 *Couns*2015;98:3-14.  
16  
17  
18  
19  
20  
21  
22  
23  
24  
25  
26  
27  
28  
29  
30  
31  
32  
33  
34  
35  
36  
37  
38  
39  
40  
41  
42  
43  
44  
45  
46  
47  
48  
49  
50  
51  
52  
53  
54  
55  
56  
57  
58  
59  
60

## Appendix

### The CR-PPOS (English version)

---

#### **Caring subscale**

During clinical process, doctors will be suspected of prying the privacy of patients when they ask patients a lot about personal backgrounds.

If a doctor's diagnosis and treatment levels are high enough, the way of his/her communication with patients is not so important.

If a doctor spends too much honesty and enthusiasm in the doctor-patient communication, he/she wouldn't have made great achievements.

Most patients in clinics want to leave the doctors' office as soon as possible(so as to reduce the time communicating with doctors)

For doctors, knowing the patient's culture and backgrounds is not very important for treating illness.

#### **Sharing subscale**

During clinical process, doctors should be the ones who dominate the conversation.

Patients should rely on doctor's professional skills during clinical process and should not try to find out the answers to their medical conditions by themselves.

Many patients keep asking questions to doctors, although they are not necessarily getting more new information.

During the clinical process, if a patient does not agree with the opinions of a doctor, then it means that the doctor doesn't get the patient's respect and trust.

During clinical process, patients should always be aware that doctors are dominant.

It is usually not very helpful if patients search for medical information on their own-instead, they could be even more confused.

---

STROBE 2007 (v4) Statement—Checklist of items that should be included in reports of *cross-sectional studies*

| Section/Topic                | Item # | Recommendation                                                                                                                                                                       | Reported on page # |
|------------------------------|--------|--------------------------------------------------------------------------------------------------------------------------------------------------------------------------------------|--------------------|
| Title and abstract           | 1      | (a) Indicate the study’s design with a commonly used term in the title or the abstract                                                                                               | 1                  |
|                              |        | (b) Provide in the abstract an informative and balanced summary of what was done and what was found                                                                                  | 2                  |
| <b>Introduction</b>          |        |                                                                                                                                                                                      |                    |
| Background/rationale         | 2      | Explain the scientific background and rationale for the investigation being reported                                                                                                 | 3-5                |
| Objectives                   | 3      | State specific objectives, including any prespecified hypotheses                                                                                                                     | 5                  |
| <b>Methods</b>               |        |                                                                                                                                                                                      |                    |
| Study design                 | 4      | Present key elements of study design early in the paper                                                                                                                              | 5-8                |
| Setting                      | 5      | Describe the setting, locations, and relevant dates, including periods of recruitment, exposure, follow-up, and data collection                                                      | 6,7                |
| Participants                 | 6      | (a) Give the eligibility criteria, and the sources and methods of selection of participants                                                                                          | 6,7                |
| Variables                    | 7      | Clearly define all outcomes, exposures, predictors, potential confounders, and effect modifiers. Give diagnostic criteria, if applicable                                             | 6-8                |
| Data sources/<br>measurement | 8*     | For each variable of interest, give sources of data and details of methods of assessment (measurement). Describe comparability of assessment methods if there is more than one group | 7,8                |
| Bias                         | 9      | Describe any efforts to address potential sources of bias                                                                                                                            | 6                  |
| Study size                   | 10     | Explain how the study size was arrived at                                                                                                                                            | 6,7                |
| Quantitative variables       | 11     | Explain how quantitative variables were handled in the analyses. If applicable, describe which groupings were chosen and why                                                         | 8,9                |
| Statistical methods          | 12     | (a) Describe all statistical methods, including those used to control for confounding                                                                                                | 8,9                |
|                              |        | (b) Describe any methods used to examine subgroups and interactions                                                                                                                  | 9                  |
|                              |        | (c) Explain how missing data were addressed                                                                                                                                          | 7,9                |
|                              |        | (d) If applicable, describe analytical methods taking account of sampling strategy                                                                                                   | -                  |
|                              |        | (e) Describe any sensitivity analyses                                                                                                                                                | -                  |
| <b>Results</b>               |        |                                                                                                                                                                                      |                    |

|                          |     |                                                                                                                                                                                                              |            |
|--------------------------|-----|--------------------------------------------------------------------------------------------------------------------------------------------------------------------------------------------------------------|------------|
| Participants             | 13* | (a) Report numbers of individuals at each stage of study—eg numbers potentially eligible, examined for eligibility, confirmed eligible, included in the study, completing follow-up, and analysed            | 9,12       |
|                          |     | (b) Give reasons for non-participation at each stage                                                                                                                                                         | 9,12       |
|                          |     | (c) Consider use of a flow diagram                                                                                                                                                                           | -          |
| Descriptive data         | 14* | (a) Give characteristics of study participants (eg demographic, clinical, social) and information on exposures and potential confounders                                                                     | 9,10,12-15 |
|                          |     | (b) Indicate number of participants with missing data for each variable of interest                                                                                                                          | 9,12-16    |
| Outcome data             | 15* | Report numbers of outcome events or summary measures                                                                                                                                                         | 10-12,15   |
| Main results             | 16  | (a) Give unadjusted estimates and, if applicable, confounder-adjusted estimates and their precision (eg, 95% confidence interval). Make clear which confounders were adjusted for and why they were included | 17,18      |
|                          |     | (b) Report category boundaries when continuous variables were categorized                                                                                                                                    | 16         |
|                          |     | (c) If relevant, consider translating estimates of relative risk into absolute risk for a meaningful time period                                                                                             | -          |
| Other analyses           | 17  | Report other analyses done—eg analyses of subgroups and interactions, and sensitivity analyses                                                                                                               | 16         |
| <b>Discussion</b>        |     |                                                                                                                                                                                                              |            |
| Key results              | 18  | Summarise key results with reference to study objectives                                                                                                                                                     | 18,19      |
| Limitations              | 19  | Discuss limitations of the study, taking into account sources of potential bias or imprecision. Discuss both direction and magnitude of any potential bias                                                   | 20,21      |
| Interpretation           | 20  | Give a cautious overall interpretation of results considering objectives, limitations, multiplicity of analyses, results from similar studies, and other relevant evidence                                   | 18-21      |
| Generalisability         | 21  | Discuss the generalisability (external validity) of the study results                                                                                                                                        | 21         |
| <b>Other information</b> |     |                                                                                                                                                                                                              |            |
| Funding                  | 22  | Give the source of funding and the role of the funders for the present study and, if applicable, for the original study on which the present article is based                                                | 22,23      |

\*Give information separately for cases and controls in case-control studies and, if applicable, for exposed and unexposed groups in cohort and cross-sectional studies.

**Note:** An Explanation and Elaboration article discusses each checklist item and gives methodological background and published examples of transparent reporting. The STROBE checklist is best used in conjunction with this article (freely available on the Web sites of PLoS Medicine at <http://www.plosmedicine.org/>, Annals of Internal Medicine at <http://www.annals.org/>, and Epidemiology at <http://www.epidem.com/>). Information on the STROBE Initiative is available at [www.strobe-statement.org](http://www.strobe-statement.org).
