# Supplementary material for: Measuring the preference towards patient-centred communication with the Chinese-revised Patient–Practitioner Orientation Scale: a cross-sectional study among physicians and patients in clinical settings in Shanghai, China
Source: PubMed Central journal article supplement — BMJ Open. 2017 Sep 18;7(9):e016902. doi: 10.1136/bmjopen-2017-016902 (PMC5623567; doi:10.1136/bmjopen-2017-016902), 2017-09-18
Supplement: bmjopen-2017-016902supp001.pdf [file bmjopen-2017-016902supp001.pdf]

## **Appendix**

### The CR-PPOS (English version)

---

#### **Caring subscale**

During clinical process, doctors will be suspected of prying the privacy of patients when they ask patients a lot about personal backgrounds.

If a doctor's diagnosis and treatment levels are high enough, the way of his/her communication with patients is not so important.

If a doctor spends too much honesty and enthusiasm in the doctor-patient communication, he/she wouldn't have made great achievements.

Most patients in clinics want to leave the doctors' office as soon as possible(so as to reduce the time communicating with doctors)

For doctors, knowing the patient's culture and backgrounds is not very important for treating illness.

#### **Sharing subscale**

During clinical process, doctors should be the ones who dominate the conversation.

Patients should rely on doctor's professional skills during clinical process and should not try to find out the answers to their medical conditions by themselves.

Many patients keep asking questions to doctors, although they are not necessarily getting more new information.

During the clinical process, if a patient does not agree with the opinions of a doctor, then it means that the doctor doesn't get the patient's respect and trust.

During clinical process, patients should always be aware that doctors are dominant.

It is usually not very helpful if patients search for medical information on their own-instead, they could be even more confused.

---
